# Supplementary material for: Identification of Five Ferroptosis-Related LncRNAs as Novel Prognosis and Diagnosis Signatures for Renal Cancer
Source: Front Mol Biosci. 2022 Jan 18;8:763697. doi: 10.3389/fmolb.2021.763697 (PMC8804361; doi:10.3389/fmolb.2021.763697)
Supplement: Supplementary file 6 [file Table5.XLSX]

## Sheet: 6a
Tag	Case	DOCK8-AS1	SNHG17	RUSC1-AS1	LINC02609	LUCAT1
TCGA-A3-3358-11	0	1	0	0	0	0
TCGA-A3-3387-11	0	1	0	0	0	0
TCGA-A4-A4ZT-11	0	0	0	1	0	0
TCGA-A4-A57E-11	0	1	0	0	0	0
TCGA-B0-4700-11	0	1	0	1	0	0
TCGA-B0-4712-11	0	0	0	0	0	0
TCGA-B0-5402-11	0	1	0	0	0	0
TCGA-B0-5690-11	0	1	0	0	0	0
TCGA-B0-5691-11	0	1	0	0	0	0
TCGA-B0-5694-11	0	1	0	0	0	0
TCGA-B0-5696-11	0	1	0	0	0	0
TCGA-B0-5697-11	0	1	0	0	0	0
TCGA-B0-5699-11	0	1	0	0	0	0
TCGA-B0-5701-11	0	0	0	0	0	0
TCGA-B0-5703-11	0	1	0	0	0	0
TCGA-B0-5705-11	0	1	0	0	0	0
TCGA-B0-5706-11	0	0	0	0	0	0
TCGA-B0-5709-11	0	1	0	0	0	0
TCGA-B0-5711-11	0	1	0	0	0	0
TCGA-B0-5712-11	0	0	1	0	0	0
TCGA-B2-5636-11	0	1	0	0	0	0
TCGA-B2-5641-11	0	0	0	0	0	0
TCGA-B8-4619-11	0	1	0	0	0	0
TCGA-B8-4620-11	0	0	1	0	0	0
TCGA-B8-4622-11	0	1	0	0	1	0
TCGA-B8-5549-11	0	0	0	0	0	0
TCGA-B8-5552-11	0	0	0	0	0	0
TCGA-B9-4115-11	0	1	1	0	0	0
TCGA-BQ-5875-11	0	1	0	0	0	0
TCGA-BQ-5877-11	0	1	0	0	0	0
TCGA-BQ-5878-11	0	1	0	0	0	0
TCGA-BQ-5879-11	0	1	0	0	0	0
TCGA-BQ-5882-11	0	1	0	0	0	0
TCGA-BQ-5884-11	0	1	0	0	0	0
TCGA-BQ-5887-11	0	1	0	0	0	0
TCGA-BQ-5888-11	0	1	0	0	0	0
TCGA-BQ-5890-11	0	1	0	0	0	0
TCGA-BQ-5891-11	0	1	0	0	0	0
TCGA-BQ-5894-11	0	1	0	0	0	0
TCGA-BQ-7044-11	0	1	0	0	0	0
TCGA-BQ-7045-11	0	1	0	0	0	0
TCGA-BQ-7046-11	0	1	1	0	0	0
TCGA-BQ-7051-11	0	1	0	1	0	0
TCGA-BQ-7055-11	0	1	0	1	0	0
TCGA-BQ-7059-11	0	1	0	1	0	0
TCGA-BQ-7061-11	0	0	1	0	0	0
TCGA-CJ-5672-11	0	1	0	0	0	0
TCGA-CJ-5676-11	0	1	0	0	0	0
TCGA-CJ-5677-11	0	1	0	0	0	0
TCGA-CJ-5678-11	0	1	0	0	0	0
TCGA-CJ-5679-11	0	1	0	0	0	0
TCGA-CJ-5680-11	0	0	0	0	0	1
TCGA-CJ-5681-11	0	1	0	1	0	1
TCGA-CJ-5689-11	0	0	0	0	0	0
TCGA-CJ-6030-11	0	1	0	0	0	0
TCGA-CJ-6033-11	0	1	1	0	0	0
TCGA-CW-5580-11	0	0	0	0	0	0
TCGA-CW-5581-11	0	1	0	0	0	0
TCGA-CW-5584-11	0	1	0	0	0	0
TCGA-CW-5585-11	0	1	0	0	0	0
TCGA-CW-5587-11	0	1	0	0	0	0
TCGA-CW-5589-11	0	1	0	0	0	0
TCGA-CW-5591-11	0	0	0	0	1	1
TCGA-CW-6087-11	0	1	0	0	0	0
TCGA-CW-6088-11	0	0	0	0	0	0
TCGA-CW-6090-11	0	1	0	0	0	0
TCGA-CZ-4863-11	0	0	0	0	0	0
TCGA-CZ-4864-11	0	1	0	0	0	0
TCGA-CZ-4865-11	0	0	0	0	0	0
TCGA-CZ-5451-11	0	1	0	0	0	0
TCGA-CZ-5452-11	0	0	0	0	0	0
TCGA-CZ-5453-11	0	0	0	0	0	0
TCGA-CZ-5454-11	0	0	0	0	0	0
TCGA-CZ-5455-11	0	0	0	0	0	0
TCGA-CZ-5456-11	0	0	0	0	0	0
TCGA-CZ-5457-11	0	0	0	0	0	0
TCGA-CZ-5458-11	0	0	0	0	0	0
TCGA-CZ-5461-11	0	1	0	0	0	0
TCGA-CZ-5462-11	0	0	0	0	0	0
TCGA-CZ-5463-11	0	0	0	0	0	0
TCGA-CZ-5465-11	0	0	0	0	0	0
TCGA-CZ-5466-11	0	1	0	0	0	0
TCGA-CZ-5467-11	0	0	1	0	0	0
TCGA-CZ-5468-11	0	0	0	0	0	0
TCGA-CZ-5469-11	0	0	0	0	0	0
TCGA-CZ-5470-11	0	0	0	0	0	0
TCGA-CZ-5982-11	0	1	0	0	0	0
TCGA-CZ-5984-11	0	1	0	0	0	0
TCGA-CZ-5985-11	0	1	0	0	0	0
TCGA-CZ-5986-11	0	1	0	0	0	0
TCGA-CZ-5987-11	0	1	0	0	0	0
TCGA-CZ-5988-11	0	1	0	0	0	0
TCGA-CZ-5989-11	0	0	0	0	0	0
TCGA-DZ-6131-11	0	1	0	0	0	0
TCGA-DZ-6132-11	0	1	0	0	0	0
TCGA-DZ-6133-11	0	1	0	0	0	0
TCGA-DZ-6134-11	0	1	0	0	1	0
TCGA-GL-6846-11	0	1	0	0	0	0
TCGA-GL-7966-11	0	1	0	0	0	0
TCGA-GL-A59R-11	0	0	1	1	0	0
TCGA-GL-A9DE-11	0	0	1	1	0	0
TCGA-P4-A5E8-11	0	0	1	1	0	0
TCGA-P4-A5ED-11	0	0	1	0	0	0
TCGA-Y8-A8RY-11	0	0	0	0	0	0
TCGA-UZ-A9PS-05	1	1	0	1	1	0
TCGA-2K-A9WE-01	1	0	1	1	0	1
TCGA-2Z-A9J1-01	1	0	1	1	0	0
TCGA-2Z-A9J2-01	1	0	1	1	0	0
TCGA-2Z-A9J3-01	1	0	1	1	0	0
TCGA-2Z-A9J5-01	1	1	1	1	0	1
TCGA-2Z-A9J6-01	1	1	1	1	0	0
TCGA-2Z-A9J7-01	1	0	1	1	1	0
TCGA-2Z-A9J8-01	1	1	1	1	0	1
TCGA-2Z-A9J9-01	1	0	1	1	0	0
TCGA-2Z-A9JD-01	1	1	0	0	0	0
TCGA-2Z-A9JE-01	1	0	1	1	0	0
TCGA-2Z-A9JG-01	1	0	1	0	0	0
TCGA-2Z-A9JI-01	1	0	1	1	1	0
TCGA-2Z-A9JJ-01	1	0	0	1	0	1
TCGA-2Z-A9JK-01	1	1	1	1	1	1
TCGA-2Z-A9JL-01	1	0	1	1	0	1
TCGA-2Z-A9JM-01	1	0	1	1	0	0
TCGA-2Z-A9JN-01	1	0	1	0	0	0
TCGA-2Z-A9JO-01	1	1	0	0	1	0
TCGA-2Z-A9JP-01	1	1	1	1	0	0
TCGA-2Z-A9JQ-01	1	0	1	1	0	0
TCGA-2Z-A9JR-01	1	1	0	1	0	0
TCGA-2Z-A9JS-01	1	0	1	1	0	0
TCGA-2Z-A9JT-01	1	1	1	0	0	0
TCGA-3Z-A93Z-01	1	1	1	0	1	0
TCGA-4A-A93W-01	1	0	1	1	0	0
TCGA-4A-A93X-01	1	1	1	0	1	1
TCGA-4A-A93Y-01	1	0	1	0	0	1
TCGA-5P-A9JU-01	1	1	1	1	1	0
TCGA-5P-A9JV-01	1	1	1	1	0	1
TCGA-5P-A9JW-01	1	1	0	1	1	0
TCGA-5P-A9JY-01	1	1	1	1	0	0
TCGA-5P-A9JZ-01	1	0	0	1	0	0
TCGA-5P-A9K0-01	1	0	1	1	0	0
TCGA-5P-A9K2-01	1	0	1	1	0	1
TCGA-5P-A9K3-01	1	1	1	1	1	1
TCGA-5P-A9K4-01	1	0	1	1	0	0
TCGA-5P-A9K6-01	1	1	1	1	0	0
TCGA-5P-A9K8-01	1	0	0	0	0	0
TCGA-5P-A9K9-01	1	0	1	1	1	1
TCGA-5P-A9KA-01	1	0	0	1	0	1
TCGA-5P-A9KC-01	1	1	0	1	0	0
TCGA-5P-A9KE-01	1	1	1	0	0	0
TCGA-5P-A9KF-01	1	0	1	1	0	0
TCGA-5P-A9KH-01	1	0	0	1	0	0
TCGA-6D-AA2E-01	1	1	0	1	1	0
TCGA-A3-3306-01	1	1	0	1	1	0
TCGA-A3-3307-01	1	1	1	1	1	1
TCGA-A3-3308-01	1	1	1	1	1	1
TCGA-A3-3311-01	1	1	1	1	1	1
TCGA-A3-3313-01	1	1	1	1	0	0
TCGA-A3-3316-01	1	1	1	1	1	1
TCGA-A3-3317-01	1	0	1	1	1	1
TCGA-A3-3319-01	1	1	1	1	1	1
TCGA-A3-3320-01	1	1	0	1	0	1
TCGA-A3-3322-01	1	1	0	1	1	1
TCGA-A3-3323-01	1	1	0	1	1	1
TCGA-A3-3324-01	1	1	0	1	1	1
TCGA-A3-3325-01	1	0	1	1	1	1
TCGA-A3-3326-01	1	1	1	1	0	1
TCGA-A3-3328-01	1	1	0	0	0	0
TCGA-A3-3329-01	1	1	0	1	1	1
TCGA-A3-3331-01	1	1	0	1	1	1
TCGA-A3-3335-01	1	0	0	1	1	1
TCGA-A3-3343-01	1	1	0	1	1	0
TCGA-A3-3346-01	1	0	1	1	1	1
TCGA-A3-3347-01	1	0	1	1	1	1
TCGA-A3-3349-01	1	1	0	1	0	0
TCGA-A3-3351-01	1	0	0	1	1	1
TCGA-A3-3352-01	1	1	0	1	1	1
TCGA-A3-3357-01	1	1	0	1	1	1
TCGA-A3-3358-01	1	0	1	1	1	1
TCGA-A3-3359-01	1	1	0	1	0	1
TCGA-A3-3362-01	1	1	1	1	0	0
TCGA-A3-3363-01	1	0	0	1	0	0
TCGA-A3-3365-01	1	0	0	1	0	1
TCGA-A3-3367-01	1	1	0	1	1	1
TCGA-A3-3370-01	1	1	0	1	0	0
TCGA-A3-3372-01	1	0	0	1	1	1
TCGA-A3-3373-01	1	1	0	0	0	1
TCGA-A3-3374-01	1	1	1	0	0	1
TCGA-A3-3376-01	1	0	1	1	0	1
TCGA-A3-3378-01	1	1	0	1	0	1
TCGA-A3-3380-01	1	0	1	1	0	0
TCGA-A3-3382-01	1	0	1	1	1	1
TCGA-A3-3383-01	1	1	1	1	1	1
TCGA-A3-3385-01	1	1	1	1	1	0
TCGA-A3-3387-01	1	0	0	1	1	1
TCGA-A3-A6NI-01	1	0	1	1	0	1
TCGA-A3-A6NJ-01	1	1	1	1	0	1
TCGA-A3-A6NL-01	1	1	1	1	0	1
TCGA-A3-A6NN-01	1	0	0	1	1	1
TCGA-A3-A8CQ-01	1	1	1	1	1	1
TCGA-A3-A8OU-01	1	1	1	1	0	1
TCGA-A3-A8OV-01	1	1	1	1	1	0
TCGA-A3-A8OW-01	1	1	1	1	0	0
TCGA-A3-A8OX-01	1	1	0	0	1	0
TCGA-A4-7286-01	1	1	0	0	1	0
TCGA-A4-7287-01	1	0	1	1	1	0
TCGA-A4-7288-01	1	0	0	0	0	0
TCGA-A4-7583-01	1	0	1	0	0	0
TCGA-A4-7584-01	1	0	0	1	0	0
TCGA-A4-7585-01	1	1	0	0	1	1
TCGA-A4-7732-01	1	0	1	1	0	0
TCGA-A4-7734-01	1	0	1	0	0	0
TCGA-A4-7828-01	1	0	0	0	0	1
TCGA-A4-7915-01	1	0	1	0	0	1
TCGA-A4-7996-01	1	0	0	0	0	1
TCGA-A4-7997-01	1	0	0	0	0	1
TCGA-A4-8098-01	1	0	1	1	0	1
TCGA-A4-8310-01	1	0	1	0	0	0
TCGA-A4-8311-01	1	0	1	1	0	0
TCGA-A4-8312-01	1	0	0	1	0	0
TCGA-A4-8515-01	1	1	0	0	0	0
TCGA-A4-8516-01	1	0	0	1	0	0
TCGA-A4-8517-01	1	0	1	0	0	0
TCGA-A4-8518-01	1	1	0	0	0	0
TCGA-A4-8630-01	1	0	0	1	0	0
TCGA-A4-A48D-01	1	1	1	0	0	0
TCGA-A4-A4ZT-01	1	0	0	1	0	0
TCGA-A4-A57E-01	1	1	1	1	1	1
TCGA-A4-A5DU-01	1	0	1	1	1	0
TCGA-A4-A5XZ-01	1	0	0	0	1	0
TCGA-A4-A5Y0-01	1	0	0	1	1	1
TCGA-A4-A5Y1-01	1	0	1	1	1	0
TCGA-A4-A6HP-01	1	0	1	1	0	0
TCGA-A4-A772-01	1	1	0	1	0	0
TCGA-A4-A7UZ-01	1	0	1	1	0	1
TCGA-AK-3425-01	1	0	0	0	1	1
TCGA-AK-3426-01	1	0	1	1	1	1
TCGA-AK-3427-01	1	0	1	0	1	0
TCGA-AK-3428-01	1	0	0	0	1	1
TCGA-AK-3429-01	1	1	1	0	1	0
TCGA-AK-3431-01	1	0	0	0	1	1
TCGA-AK-3433-01	1	1	1	0	0	0
TCGA-AK-3434-01	1	1	0	1	1	0
TCGA-AK-3436-01	1	0	0	0	1	1
TCGA-AK-3440-01	1	1	0	0	0	0
TCGA-AK-3443-01	1	1	0	1	0	0
TCGA-AK-3445-01	1	0	1	1	1	1
TCGA-AK-3447-01	1	0	1	0	0	0
TCGA-AK-3450-01	1	1	0	1	0	0
TCGA-AK-3451-01	1	1	1	0	1	1
TCGA-AK-3453-01	1	1	1	1	1	1
TCGA-AK-3454-01	1	0	1	1	1	1
TCGA-AK-3455-01	1	1	1	1	1	1
TCGA-AK-3456-01	1	1	0	0	0	0
TCGA-AK-3458-01	1	1	1	1	1	0
TCGA-AK-3460-01	1	0	0	1	1	0
TCGA-AK-3461-01	1	0	1	1	1	1
TCGA-AK-3465-01	1	0	1	1	0	0
TCGA-AL-3466-01	1	0	1	1	1	1
TCGA-AL-3467-01	1	0	1	1	0	0
TCGA-AL-3468-01	1	1	1	1	1	1
TCGA-AL-3471-01	1	0	1	1	1	1
TCGA-AL-3472-01	1	0	1	1	0	0
TCGA-AL-3473-01	1	1	0	1	1	0
TCGA-AL-7173-01	1	0	1	0	1	1
TCGA-AL-A5DJ-01	1	0	1	0	1	1
TCGA-AS-3777-01	1	0	1	0	1	0
TCGA-AS-3778-01	1	1	0	1	0	1
TCGA-AT-A5NU-01	1	0	1	1	0	0
TCGA-B0-4688-01	1	0	1	1	1	1
TCGA-B0-4690-01	1	0	1	1	1	1
TCGA-B0-4691-01	1	1	1	1	1	1
TCGA-B0-4693-01	1	1	0	1	1	1
TCGA-B0-4694-01	1	1	0	0	1	1
TCGA-B0-4696-01	1	0	1	1	1	0
TCGA-B0-4697-01	1	0	1	1	1	1
TCGA-B0-4698-01	1	0	1	1	1	1
TCGA-B0-4699-01	1	0	1	1	0	1
TCGA-B0-4700-01	1	0	1	0	1	1
TCGA-B0-4701-01	1	0	1	1	1	1
TCGA-B0-4703-01	1	0	1	1	1	1
TCGA-B0-4706-01	1	1	1	1	1	1
TCGA-B0-4707-01	1	0	1	1	1	1
TCGA-B0-4710-01	1	1	1	1	1	1
TCGA-B0-4712-01	1	0	1	0	1	1
TCGA-B0-4713-01	1	1	1	1	1	1
TCGA-B0-4714-01	1	1	1	1	1	1
TCGA-B0-4718-01	1	1	1	1	0	1
TCGA-B0-4810-01	1	0	1	1	1	1
TCGA-B0-4811-01	1	1	1	1	1	1
TCGA-B0-4813-01	1	0	1	1	1	1
TCGA-B0-4814-01	1	1	0	1	1	1
TCGA-B0-4815-01	1	0	1	1	1	1
TCGA-B0-4816-01	1	1	1	1	0	0
TCGA-B0-4817-01	1	1	0	1	1	1
TCGA-B0-4818-01	1	1	1	1	1	0
TCGA-B0-4819-01	1	0	1	1	1	1
TCGA-B0-4821-01	1	0	1	1	1	1
TCGA-B0-4822-01	1	0	1	1	1	1
TCGA-B0-4823-01	1	0	0	0	1	1
TCGA-B0-4824-01	1	1	1	1	1	0
TCGA-B0-4827-01	1	1	1	0	1	1
TCGA-B0-4828-01	1	1	1	1	1	1
TCGA-B0-4833-01	1	1	1	1	1	1
TCGA-B0-4834-01	1	0	0	0	0	0
TCGA-B0-4836-01	1	0	0	1	1	1
TCGA-B0-4837-01	1	1	0	1	1	1
TCGA-B0-4838-01	1	1	1	1	0	0
TCGA-B0-4839-01	1	1	0	0	1	0
TCGA-B0-4841-01	1	1	1	0	1	1
TCGA-B0-4842-01	1	0	1	0	1	1
TCGA-B0-4843-01	1	0	1	1	1	0
TCGA-B0-4844-01	1	1	1	1	1	1
TCGA-B0-4845-01	1	0	1	1	1	1
TCGA-B0-4846-01	1	1	0	1	0	1
TCGA-B0-4847-01	1	1	1	1	1	1
TCGA-B0-4848-01	1	1	0	0	1	1
TCGA-B0-4849-01	1	0	1	1	1	1
TCGA-B0-4852-01	1	1	1	1	1	1
TCGA-B0-4945-01	1	0	0	1	0	1
TCGA-B0-5075-01	1	1	0	1	0	1
TCGA-B0-5077-01	1	0	0	1	1	1
TCGA-B0-5080-01	1	0	0	0	0	1
TCGA-B0-5081-01	1	0	1	1	1	1
TCGA-B0-5083-01	1	1	0	0	0	0
TCGA-B0-5084-01	1	0	1	1	1	1
TCGA-B0-5085-01	1	1	1	1	1	1
TCGA-B0-5088-01	1	1	1	1	0	1
TCGA-B0-5092-01	1	1	1	1	1	1
TCGA-B0-5094-01	1	0	1	1	1	1
TCGA-B0-5095-01	1	0	1	1	1	1
TCGA-B0-5096-01	1	0	1	0	1	1
TCGA-B0-5097-01	1	0	1	0	1	1
TCGA-B0-5098-01	1	0	1	1	1	0
TCGA-B0-5099-01	1	1	1	1	1	1
TCGA-B0-5100-01	1	0	1	0	0	0
TCGA-B0-5102-01	1	1	0	1	0	0
TCGA-B0-5104-01	1	1	1	1	0	1
TCGA-B0-5106-01	1	0	1	1	1	1
TCGA-B0-5107-01	1	1	1	1	1	0
TCGA-B0-5108-01	1	0	1	0	1	1
TCGA-B0-5109-01	1	0	1	0	1	1
TCGA-B0-5110-01	1	1	0	1	1	1
TCGA-B0-5113-01	1	0	0	1	1	1
TCGA-B0-5115-01	1	1	0	1	0	1
TCGA-B0-5116-01	1	1	1	0	1	1
TCGA-B0-5117-01	1	1	1	1	0	0
TCGA-B0-5119-01	1	1	0	0	0	0
TCGA-B0-5120-01	1	0	0	0	1	1
TCGA-B0-5121-01	1	1	0	1	1	1
TCGA-B0-5399-01	1	1	0	1	1	1
TCGA-B0-5400-01	1	0	1	0	1	1
TCGA-B0-5402-01	1	1	0	0	1	1
TCGA-B0-5690-01	1	1	0	0	1	1
TCGA-B0-5691-01	1	1	0	0	0	0
TCGA-B0-5692-01	1	0	0	0	1	0
TCGA-B0-5693-01	1	1	0	0	1	1
TCGA-B0-5694-01	1	0	0	0	1	1
TCGA-B0-5695-01	1	1	1	0	1	1
TCGA-B0-5696-01	1	1	0	0	0	1
TCGA-B0-5697-01	1	0	0	0	0	1
TCGA-B0-5698-01	1	1	1	0	1	1
TCGA-B0-5699-01	1	1	0	0	1	0
TCGA-B0-5700-01	1	1	0	0	1	1
TCGA-B0-5701-01	1	0	0	0	1	1
TCGA-B0-5702-01	1	0	1	1	1	1
TCGA-B0-5703-01	1	1	1	0	1	0
TCGA-B0-5705-01	1	1	0	0	0	0
TCGA-B0-5706-01	1	0	0	0	1	1
TCGA-B0-5707-01	1	1	1	0	0	0
TCGA-B0-5709-01	1	1	0	0	1	0
TCGA-B0-5710-01	1	0	0	0	1	1
TCGA-B0-5711-01	1	1	0	0	0	0
TCGA-B0-5712-01	1	1	0	0	1	0
TCGA-B0-5713-01	1	1	0	0	0	0
TCGA-B0-5812-01	1	1	0	0	0	1
TCGA-B1-5398-01	1	1	0	0	0	1
TCGA-B1-7332-01	1	1	1	0	0	0
TCGA-B1-A47M-01	1	1	0	1	0	1
TCGA-B1-A47N-01	1	0	1	1	1	0
TCGA-B1-A47O-01	1	1	1	1	0	1
TCGA-B1-A654-01	1	0	1	0	0	0
TCGA-B1-A655-01	1	0	0	0	0	0
TCGA-B1-A656-01	1	1	1	0	1	0
TCGA-B1-A657-01	1	1	0	1	0	0
TCGA-B2-3923-01	1	0	0	1	0	1
TCGA-B2-3924-01	1	1	1	0	1	0
TCGA-B2-4098-01	1	0	1	1	0	1
TCGA-B2-4099-01	1	1	1	1	1	1
TCGA-B2-4101-01	1	0	0	1	1	1
TCGA-B2-4102-01	1	1	0	1	0	0
TCGA-B2-5633-01	1	0	0	0	1	1
TCGA-B2-5635-01	1	0	0	1	1	1
TCGA-B2-5636-01	1	0	0	0	0	0
TCGA-B2-5639-01	1	1	0	0	1	0
TCGA-B2-5641-01	1	0	1	0	1	0
TCGA-B2-A4SR-01	1	0	1	1	0	1
TCGA-B3-3925-01	1	0	0	1	0	0
TCGA-B3-3926-01	1	0	0	0	1	0
TCGA-B3-4103-01	1	0	0	1	0	0
TCGA-B3-4104-01	1	0	1	1	0	0
TCGA-B3-8121-01	1	0	1	1	0	1
TCGA-B3-A6W5-01	1	0	1	1	0	0
TCGA-B4-5377-01	1	1	0	0	1	1
TCGA-B4-5378-01	1	0	1	0	0	0
TCGA-B4-5832-01	1	1	0	0	1	1
TCGA-B4-5834-01	1	0	0	0	1	0
TCGA-B4-5835-01	1	1	1	0	0	0
TCGA-B4-5836-01	1	1	0	0	1	0
TCGA-B4-5838-01	1	1	0	0	1	0
TCGA-B4-5843-01	1	0	0	0	0	0
TCGA-B4-5844-01	1	1	0	0	0	0
TCGA-B8-4143-01	1	0	1	1	1	1
TCGA-B8-4146-01	1	1	0	0	0	1
TCGA-B8-4148-01	1	1	0	1	1	0
TCGA-B8-4151-01	1	1	1	0	1	0
TCGA-B8-4153-01	1	1	1	1	1	1
TCGA-B8-4154-01	1	1	0	0	1	0
TCGA-B8-4619-01	1	1	0	0	0	0
TCGA-B8-4620-01	1	0	1	1	1	1
TCGA-B8-4621-01	1	1	0	0	0	0
TCGA-B8-4622-01	1	1	1	1	1	1
TCGA-B8-5158-01	1	1	0	0	1	1
TCGA-B8-5159-01	1	1	0	0	1	0
TCGA-B8-5162-01	1	0	0	0	1	1
TCGA-B8-5163-01	1	0	0	0	1	1
TCGA-B8-5164-01	1	1	0	0	0	0
TCGA-B8-5165-01	1	1	0	0	0	0
TCGA-B8-5545-01	1	0	1	0	0	1
TCGA-B8-5546-01	1	1	0	0	0	0
TCGA-B8-5549-01	1	0	0	0	1	1
TCGA-B8-5550-01	1	1	1	0	1	1
TCGA-B8-5551-01	1	0	1	0	1	1
TCGA-B8-5552-01	1	0	1	0	0	1
TCGA-B8-5553-01	1	1	0	0	1	0
TCGA-B8-A54D-01	1	0	0	1	1	1
TCGA-B8-A54E-01	1	1	1	0	1	1
TCGA-B8-A54F-01	1	0	0	1	1	1
TCGA-B8-A54G-01	1	1	1	1	1	1
TCGA-B8-A54H-01	1	1	1	1	0	0
TCGA-B8-A54I-01	1	0	1	1	1	1
TCGA-B8-A54J-01	1	1	1	1	1	1
TCGA-B8-A54K-01	1	0	1	1	0	0
TCGA-B8-A7U6-01	1	0	1	0	1	1
TCGA-B8-A8YJ-01	1	0	1	1	0	1
TCGA-B9-4113-01	1	0	1	1	0	0
TCGA-B9-4115-01	1	0	1	1	0	1
TCGA-B9-4116-01	1	0	1	1	0	1
TCGA-B9-4117-01	1	0	1	1	0	0
TCGA-B9-4617-01	1	0	1	1	0	0
TCGA-B9-5155-01	1	0	0	0	0	0
TCGA-B9-5156-01	1	1	0	0	0	0
TCGA-B9-7268-01	1	0	0	0	0	0
TCGA-B9-A44B-01	1	1	1	1	1	0
TCGA-B9-A5W7-01	1	1	1	0	0	0
TCGA-B9-A5W8-01	1	1	1	0	0	0
TCGA-B9-A5W9-01	1	0	1	0	0	0
TCGA-B9-A69E-01	1	0	1	1	0	0
TCGA-B9-A8YH-01	1	1	1	1	0	0
TCGA-B9-A8YI-01	1	1	1	0	0	0
TCGA-BP-4158-01	1	1	0	1	1	0
TCGA-BP-4159-01	1	1	1	0	1	1
TCGA-BP-4160-01	1	0	0	0	1	1
TCGA-BP-4161-01	1	1	1	1	1	1
TCGA-BP-4162-01	1	1	0	1	0	1
TCGA-BP-4163-01	1	1	0	1	0	0
TCGA-BP-4164-01	1	1	1	1	1	0
TCGA-BP-4165-01	1	1	1	1	1	1
TCGA-BP-4166-01	1	1	0	0	1	1
TCGA-BP-4167-01	1	0	0	0	1	1
TCGA-BP-4169-01	1	1	1	1	1	1
TCGA-BP-4170-01	1	1	0	0	1	1
TCGA-BP-4173-01	1	0	0	1	0	1
TCGA-BP-4174-01	1	1	0	1	1	1
TCGA-BP-4176-01	1	0	1	1	1	1
TCGA-BP-4177-01	1	0	0	0	0	0
TCGA-BP-4325-01	1	1	0	1	0	0
TCGA-BP-4326-01	1	0	1	1	1	1
TCGA-BP-4327-01	1	1	1	1	1	1
TCGA-BP-4329-01	1	1	0	1	1	1
TCGA-BP-4330-01	1	1	0	1	0	0
TCGA-BP-4331-01	1	1	0	1	0	1
TCGA-BP-4332-01	1	1	1	1	0	1
TCGA-BP-4334-01	1	1	1	1	0	0
TCGA-BP-4335-01	1	1	1	1	1	1
TCGA-BP-4337-01	1	1	1	1	1	1
TCGA-BP-4338-01	1	0	0	0	1	1
TCGA-BP-4340-01	1	1	0	1	0	1
TCGA-BP-4341-01	1	1	1	1	1	0
TCGA-BP-4342-01	1	1	1	1	1	1
TCGA-BP-4343-01	1	0	0	0	1	1
TCGA-BP-4344-01	1	0	0	1	1	1
TCGA-BP-4345-01	1	0	1	1	1	1
TCGA-BP-4346-01	1	1	1	1	0	1
TCGA-BP-4347-01	1	1	0	1	1	1
TCGA-BP-4349-01	1	0	1	1	1	1
TCGA-BP-4351-01	1	1	1	1	1	1
TCGA-BP-4352-01	1	0	1	1	1	1
TCGA-BP-4353-01	1	0	0	0	1	1
TCGA-BP-4354-01	1	0	1	1	1	1
TCGA-BP-4355-01	1	0	1	1	1	1
TCGA-BP-4756-01	1	1	0	1	1	0
TCGA-BP-4758-01	1	1	0	1	1	0
TCGA-BP-4759-01	1	1	1	0	1	1
TCGA-BP-4760-01	1	0	0	0	0	0
TCGA-BP-4761-01	1	1	1	0	1	1
TCGA-BP-4762-01	1	0	0	0	0	0
TCGA-BP-4763-01	1	0	0	0	1	1
TCGA-BP-4765-01	1	1	1	1	0	1
TCGA-BP-4766-01	1	1	0	1	0	1
TCGA-BP-4768-01	1	1	1	1	1	1
TCGA-BP-4769-01	1	0	0	0	0	0
TCGA-BP-4770-01	1	0	1	0	1	0
TCGA-BP-4771-01	1	1	1	1	1	1
TCGA-BP-4774-01	1	1	1	1	1	1
TCGA-BP-4775-01	1	1	0	1	1	1
TCGA-BP-4776-01	1	1	1	1	0	1
TCGA-BP-4777-01	1	1	1	1	1	1
TCGA-BP-4781-01	1	0	0	0	1	1
TCGA-BP-4782-01	1	1	0	0	0	1
TCGA-BP-4784-01	1	0	0	0	0	0
TCGA-BP-4787-01	1	1	0	1	1	1
TCGA-BP-4789-01	1	1	0	0	0	1
TCGA-BP-4790-01	1	0	0	1	1	1
TCGA-BP-4795-01	1	0	0	0	0	0
TCGA-BP-4797-01	1	1	0	0	1	1
TCGA-BP-4798-01	1	1	0	1	1	1
TCGA-BP-4799-01	1	0	1	0	1	1
TCGA-BP-4801-01	1	1	0	0	1	1
TCGA-BP-4803-01	1	1	1	0	1	0
TCGA-BP-4804-01	1	1	1	1	1	1
TCGA-BP-4807-01	1	1	0	0	0	1
TCGA-BP-4959-01	1	1	1	0	1	0
TCGA-BP-4960-01	1	1	1	1	1	1
TCGA-BP-4961-01	1	0	0	1	1	1
TCGA-BP-4962-01	1	1	0	0	1	0
TCGA-BP-4963-01	1	0	1	1	1	1
TCGA-BP-4964-01	1	1	0	1	1	1
TCGA-BP-4965-01	1	0	0	0	0	1
TCGA-BP-4967-01	1	0	0	1	1	1
TCGA-BP-4968-01	1	1	0	1	1	1
TCGA-BP-4969-01	1	1	1	1	0	0
TCGA-BP-4970-01	1	0	0	0	0	0
TCGA-BP-4971-01	1	0	1	1	1	1
TCGA-BP-4972-01	1	0	0	1	1	1
TCGA-BP-4973-01	1	1	1	1	1	0
TCGA-BP-4974-01	1	0	1	1	1	1
TCGA-BP-4975-01	1	1	0	0	1	1
TCGA-BP-4976-01	1	1	0	0	0	0
TCGA-BP-4977-01	1	1	0	1	1	1
TCGA-BP-4981-01	1	1	1	1	1	1
TCGA-BP-4982-01	1	1	0	1	0	1
TCGA-BP-4983-01	1	1	1	1	1	1
TCGA-BP-4985-01	1	0	0	0	1	1
TCGA-BP-4986-01	1	0	1	1	1	1
TCGA-BP-4987-01	1	1	0	1	1	0
TCGA-BP-4989-01	1	0	1	1	1	1
TCGA-BP-4991-01	1	1	0	1	1	1
TCGA-BP-4992-01	1	0	1	1	1	1
TCGA-BP-4993-01	1	1	1	0	1	0
TCGA-BP-4994-01	1	0	0	0	0	0
TCGA-BP-4995-01	1	0	0	0	1	0
TCGA-BP-4998-01	1	0	0	1	0	1
TCGA-BP-4999-01	1	0	0	1	1	0
TCGA-BP-5000-01	1	1	1	1	1	1
TCGA-BP-5001-01	1	1	1	1	0	1
TCGA-BP-5004-01	1	1	0	1	1	1
TCGA-BP-5006-01	1	1	1	1	1	1
TCGA-BP-5007-01	1	1	0	1	1	0
TCGA-BP-5008-01	1	0	0	1	0	1
TCGA-BP-5009-01	1	0	1	1	1	1
TCGA-BP-5010-01	1	0	1	1	1	1
TCGA-BP-5168-01	1	1	0	0	1	1
TCGA-BP-5169-01	1	0	1	1	1	1
TCGA-BP-5170-01	1	0	0	0	1	0
TCGA-BP-5173-01	1	1	1	0	0	0
TCGA-BP-5174-01	1	1	0	0	0	0
TCGA-BP-5175-01	1	0	1	1	0	1
TCGA-BP-5176-01	1	1	0	0	0	1
TCGA-BP-5177-01	1	1	0	0	1	1
TCGA-BP-5178-01	1	0	1	0	1	1
TCGA-BP-5180-01	1	0	0	0	1	1
TCGA-BP-5181-01	1	1	0	0	1	1
TCGA-BP-5182-01	1	1	0	0	0	1
TCGA-BP-5183-01	1	0	1	1	1	1
TCGA-BP-5184-01	1	1	0	0	1	0
TCGA-BP-5185-01	1	1	1	1	1	0
TCGA-BP-5186-01	1	1	0	1	1	0
TCGA-BP-5187-01	1	0	0	0	1	1
TCGA-BP-5189-01	1	0	0	0	1	1
TCGA-BP-5190-01	1	1	0	1	1	1
TCGA-BP-5191-01	1	1	0	1	1	1
TCGA-BP-5192-01	1	1	1	0	0	0
TCGA-BP-5194-01	1	1	0	0	1	1
TCGA-BP-5195-01	1	1	0	0	1	1
TCGA-BP-5196-01	1	0	1	0	1	1
TCGA-BP-5198-01	1	0	0	0	1	1
TCGA-BP-5199-01	1	0	1	1	1	1
TCGA-BP-5200-01	1	0	0	0	1	1
TCGA-BP-5201-01	1	0	1	1	1	1
TCGA-BP-5202-01	1	1	0	0	1	0
TCGA-BQ-5875-01	1	1	0	0	0	0
TCGA-BQ-5876-01	1	1	1	0	1	0
TCGA-BQ-5877-01	1	0	1	0	1	0
TCGA-BQ-5878-01	1	0	1	0	1	1
TCGA-BQ-5879-01	1	0	0	0	0	1
TCGA-BQ-5880-01	1	1	0	0	1	0
TCGA-BQ-5881-01	1	1	1	0	0	0
TCGA-BQ-5882-01	1	1	1	0	1	0
TCGA-BQ-5883-01	1	0	1	0	0	0
TCGA-BQ-5884-01	1	0	1	0	0	0
TCGA-BQ-5885-01	1	0	1	1	0	1
TCGA-BQ-5886-01	1	1	0	0	0	0
TCGA-BQ-5887-01	1	0	0	0	1	0
TCGA-BQ-5888-01	1	0	1	1	0	0
TCGA-BQ-5889-01	1	0	1	0	0	0
TCGA-BQ-5890-01	1	1	0	0	1	0
TCGA-BQ-5891-01	1	0	1	0	1	0
TCGA-BQ-5892-01	1	1	0	0	1	0
TCGA-BQ-5893-01	1	0	1	0	0	1
TCGA-BQ-5894-01	1	0	1	0	0	1
TCGA-BQ-7044-01	1	0	0	0	0	1
TCGA-BQ-7045-01	1	0	0	0	0	1
TCGA-BQ-7046-01	1	0	1	0	1	0
TCGA-BQ-7048-01	1	0	1	0	0	0
TCGA-BQ-7049-01	1	0	0	0	0	1
TCGA-BQ-7050-01	1	1	0	0	1	0
TCGA-BQ-7051-01	1	0	0	0	0	0
TCGA-BQ-7053-01	1	0	0	0	1	0
TCGA-BQ-7055-01	1	0	0	0	0	0
TCGA-BQ-7056-01	1	0	1	1	1	0
TCGA-BQ-7058-01	1	1	0	1	1	0
TCGA-BQ-7059-01	1	1	0	0	0	0
TCGA-BQ-7060-01	1	1	0	0	0	0
TCGA-BQ-7061-01	1	1	1	0	1	0
TCGA-BQ-7062-01	1	0	1	0	0	0
TCGA-CJ-4634-01	1	1	0	1	1	0
TCGA-CJ-4635-01	1	0	1	1	1	1
TCGA-CJ-4636-01	1	0	0	1	1	1
TCGA-CJ-4637-01	1	1	0	1	1	1
TCGA-CJ-4638-01	1	1	1	1	1	1
TCGA-CJ-4639-01	1	1	0	1	0	1
TCGA-CJ-4640-01	1	1	0	0	0	0
TCGA-CJ-4641-01	1	1	0	1	1	1
TCGA-CJ-4642-01	1	0	1	1	1	1
TCGA-CJ-4643-01	1	1	0	1	0	0
TCGA-CJ-4644-01	1	1	0	0	1	0
TCGA-CJ-4868-01	1	0	1	0	1	1
TCGA-CJ-4869-01	1	1	0	0	1	1
TCGA-CJ-4870-01	1	1	1	0	1	0
TCGA-CJ-4871-01	1	1	0	0	1	1
TCGA-CJ-4872-01	1	1	1	0	1	1
TCGA-CJ-4873-01	1	0	1	1	1	1
TCGA-CJ-4874-01	1	1	0	0	1	0
TCGA-CJ-4875-01	1	1	1	1	1	1
TCGA-CJ-4876-01	1	1	1	1	1	1
TCGA-CJ-4878-01	1	1	1	1	1	1
TCGA-CJ-4881-01	1	0	1	1	1	1
TCGA-CJ-4882-01	1	0	1	1	1	1
TCGA-CJ-4884-01	1	1	0	1	1	0
TCGA-CJ-4885-01	1	1	0	0	1	1
TCGA-CJ-4886-01	1	1	1	0	1	1
TCGA-CJ-4887-01	1	1	0	1	1	0
TCGA-CJ-4888-01	1	0	1	1	1	1
TCGA-CJ-4889-01	1	0	0	1	0	1
TCGA-CJ-4890-01	1	0	1	0	1	1
TCGA-CJ-4891-01	1	0	1	1	1	1
TCGA-CJ-4892-01	1	1	1	1	1	0
TCGA-CJ-4893-01	1	1	0	0	1	1
TCGA-CJ-4894-01	1	0	0	1	0	0
TCGA-CJ-4895-01	1	0	0	1	1	1
TCGA-CJ-4897-01	1	1	0	0	0	0
TCGA-CJ-4899-01	1	0	0	1	0	1
TCGA-CJ-4900-01	1	1	1	1	1	1
TCGA-CJ-4901-01	1	0	1	0	1	1
TCGA-CJ-4902-01	1	1	1	1	1	1
TCGA-CJ-4903-01	1	1	0	1	1	1
TCGA-CJ-4904-01	1	0	0	0	1	1
TCGA-CJ-4905-01	1	1	0	0	0	0
TCGA-CJ-4907-01	1	1	0	0	0	1
TCGA-CJ-4908-01	1	0	1	1	1	1
TCGA-CJ-4912-01	1	0	1	1	1	1
TCGA-CJ-4916-01	1	1	1	1	1	1
TCGA-CJ-4918-01	1	0	1	0	1	1
TCGA-CJ-4920-01	1	1	1	1	1	1
TCGA-CJ-5671-01	1	0	1	0	1	1
TCGA-CJ-5672-01	1	1	0	0	1	0
TCGA-CJ-5675-01	1	1	0	0	1	0
TCGA-CJ-5676-01	1	1	1	0	1	1
TCGA-CJ-5677-01	1	0	1	0	1	0
TCGA-CJ-5678-01	1	1	1	0	1	1
TCGA-CJ-5679-01	1	0	1	1	1	1
TCGA-CJ-5680-01	1	0	1	0	1	0
TCGA-CJ-5681-01	1	0	0	0	1	1
TCGA-CJ-5682-01	1	1	0	0	1	0
TCGA-CJ-5683-01	1	1	0	0	1	1
TCGA-CJ-5684-01	1	1	1	0	1	1
TCGA-CJ-5686-01	1	1	0	0	0	1
TCGA-CJ-5689-01	1	1	0	0	1	1
TCGA-CJ-6027-01	1	0	0	0	1	1
TCGA-CJ-6028-01	1	0	0	0	1	1
TCGA-CJ-6030-01	1	0	0	0	1	1
TCGA-CJ-6031-01	1	1	0	0	1	1
TCGA-CJ-6032-01	1	1	0	0	1	1
TCGA-CJ-6033-01	1	0	1	0	1	1
TCGA-CW-5580-01	1	0	0	0	1	1
TCGA-CW-5581-01	1	1	0	0	1	0
TCGA-CW-5583-01	1	0	0	0	0	0
TCGA-CW-5584-01	1	1	0	0	1	1
TCGA-CW-5585-01	1	1	0	0	0	0
TCGA-CW-5587-01	1	1	0	0	0	0
TCGA-CW-5588-01	1	0	1	0	1	1
TCGA-CW-5589-01	1	1	0	0	0	1
TCGA-CW-5590-01	1	0	1	0	1	1
TCGA-CW-5591-01	1	1	0	0	0	0
TCGA-CW-6087-01	1	0	1	0	0	1
TCGA-CW-6088-01	1	1	0	1	0	1
TCGA-CW-6090-01	1	0	0	0	1	1
TCGA-CW-6093-01	1	0	1	0	1	1
TCGA-CW-6097-01	1	0	0	0	1	1
TCGA-CZ-4853-01	1	1	0	1	1	1
TCGA-CZ-4854-01	1	0	1	1	1	1
TCGA-CZ-4856-01	1	1	0	0	1	1
TCGA-CZ-4857-01	1	1	1	1	1	1
TCGA-CZ-4858-01	1	0	1	0	1	1
TCGA-CZ-4859-01	1	1	0	0	0	0
TCGA-CZ-4860-01	1	0	1	0	1	1
TCGA-CZ-4861-01	1	0	1	0	1	1
TCGA-CZ-4862-01	1	0	0	1	0	0
TCGA-CZ-4863-01	1	1	0	1	1	0
TCGA-CZ-4864-01	1	1	1	1	1	0
TCGA-CZ-4865-01	1	0	0	0	1	1
TCGA-CZ-4866-01	1	1	0	1	1	0
TCGA-CZ-5451-01	1	1	0	0	0	0
TCGA-CZ-5452-01	1	1	0	1	1	0
TCGA-CZ-5453-01	1	1	1	0	1	1
TCGA-CZ-5454-01	1	0	0	0	1	1
TCGA-CZ-5455-01	1	0	0	0	1	1
TCGA-CZ-5456-01	1	0	0	0	1	1
TCGA-CZ-5457-01	1	1	0	0	1	0
TCGA-CZ-5458-01	1	1	0	0	1	1
TCGA-CZ-5459-01	1	1	1	0	1	1
TCGA-CZ-5460-01	1	1	1	0	1	1
TCGA-CZ-5461-01	1	0	1	0	1	1
TCGA-CZ-5462-01	1	1	0	0	1	1
TCGA-CZ-5463-01	1	1	0	0	1	1
TCGA-CZ-5464-01	1	1	1	0	1	1
TCGA-CZ-5465-01	1	1	1	0	1	1
TCGA-CZ-5466-01	1	1	1	0	1	1
TCGA-CZ-5467-01	1	0	1	0	1	1
TCGA-CZ-5468-01	1	0	1	0	1	1
TCGA-CZ-5469-01	1	0	1	0	1	1
TCGA-CZ-5470-01	1	1	0	0	1	0
TCGA-CZ-5982-01	1	0	1	0	1	1
TCGA-CZ-5984-01	1	0	0	0	1	1
TCGA-CZ-5985-01	1	0	0	0	1	1
TCGA-CZ-5986-01	1	1	0	0	0	1
TCGA-CZ-5987-01	1	0	0	0	1	0
TCGA-CZ-5988-01	1	0	0	0	0	1
TCGA-CZ-5989-01	1	1	0	0	1	0
TCGA-DV-5565-01	1	0	1	0	0	1
TCGA-DV-5566-01	1	1	0	0	1	1
TCGA-DV-5567-01	1	0	0	0	0	0
TCGA-DV-5568-01	1	1	1	0	1	1
TCGA-DV-5569-01	1	0	0	0	0	1
TCGA-DV-5573-01	1	0	0	1	1	0
TCGA-DV-5574-01	1	0	0	0	0	1
TCGA-DV-5575-01	1	0	0	0	1	1
TCGA-DV-5576-01	1	0	1	0	0	0
TCGA-DV-A4VX-01	1	1	1	1	1	1
TCGA-DV-A4VZ-01	1	0	1	1	0	1
TCGA-DV-A4W0-01	1	0	1	1	1	1
TCGA-DW-5560-01	1	0	1	1	0	0
TCGA-DW-5561-01	1	0	1	1	0	0
TCGA-DW-7834-01	1	1	1	0	0	1
TCGA-DW-7836-01	1	0	1	0	0	0
TCGA-DW-7837-01	1	0	1	0	0	0
TCGA-DW-7838-01	1	0	0	0	0	1
TCGA-DW-7839-01	1	0	0	1	0	0
TCGA-DW-7840-01	1	0	1	1	0	0
TCGA-DW-7841-01	1	0	1	1	0	1
TCGA-DW-7842-01	1	0	1	1	0	0
TCGA-DW-7963-01	1	1	1	1	0	1
TCGA-DZ-6132-01	1	0	0	0	0	1
TCGA-DZ-6133-01	1	0	0	0	0	0
TCGA-DZ-6134-01	1	0	0	0	0	0
TCGA-DZ-6135-01	1	0	0	0	0	0
TCGA-EU-5904-01	1	1	0	0	0	1
TCGA-EU-5905-01	1	0	1	0	0	1
TCGA-EU-5906-01	1	1	0	0	0	1
TCGA-EU-5907-01	1	1	1	0	1	1
TCGA-EV-5901-01	1	0	0	1	0	0
TCGA-EV-5902-01	1	0	1	1	0	0
TCGA-EV-5903-01	1	0	0	0	0	0
TCGA-F9-A4JJ-01	1	0	1	1	1	1
TCGA-F9-A7Q0-01	1	0	0	1	1	0
TCGA-F9-A7VF-01	1	1	1	1	0	0
TCGA-F9-A8NY-01	1	0	1	1	0	1
TCGA-F9-A97G-01	1	1	0	0	0	1
TCGA-G6-A5PC-01	1	1	1	1	1	0
TCGA-G6-A8L6-01	1	1	1	1	1	1
TCGA-G6-A8L7-01	1	1	1	1	1	1
TCGA-G6-A8L8-01	1	1	1	1	0	0
TCGA-G7-6789-01	1	0	1	0	1	0
TCGA-G7-6790-01	1	1	0	0	0	0
TCGA-G7-6792-01	1	1	0	0	0	0
TCGA-G7-6793-01	1	0	0	0	1	1
TCGA-G7-6795-01	1	1	1	1	0	0
TCGA-G7-6796-01	1	0	1	0	0	0
TCGA-G7-6797-01	1	0	0	0	0	0
TCGA-G7-7501-01	1	0	0	0	0	0
TCGA-G7-7502-01	1	0	0	1	1	1
TCGA-G7-A4TM-01	1	0	1	1	0	0
TCGA-G7-A8LB-01	1	1	1	1	0	0
TCGA-G7-A8LC-01	1	0	1	1	1	0
TCGA-G7-A8LD-01	1	0	1	1	1	1
TCGA-G7-A8LE-01	1	0	0	1	0	0
TCGA-GK-A6C7-01	1	0	1	1	1	1
TCGA-GL-6846-01	1	1	0	0	1	0
TCGA-GL-7773-01	1	0	0	0	0	1
TCGA-GL-7966-01	1	0	1	1	0	1
TCGA-GL-8500-01	1	0	0	0	0	0
TCGA-GL-A4EM-01	1	1	1	0	1	1
TCGA-GL-A59R-01	1	0	1	1	0	0
TCGA-GL-A59T-01	1	0	1	0	0	0
TCGA-GL-A9DC-01	1	1	1	1	0	0
TCGA-GL-A9DD-01	1	0	1	1	0	1
TCGA-GL-A9DE-01	1	1	1	1	1	0
TCGA-HE-7128-01	1	0	1	0	0	0
TCGA-HE-7129-01	1	0	0	0	0	0
TCGA-HE-7130-01	1	0	1	1	0	0
TCGA-HE-A5NF-01	1	0	1	0	0	0
TCGA-HE-A5NH-01	1	0	0	1	0	0
TCGA-HE-A5NI-01	1	0	0	1	0	0
TCGA-HE-A5NJ-01	1	0	1	1	0	0
TCGA-HE-A5NK-01	1	0	1	0	0	1
TCGA-HE-A5NL-01	1	0	0	1	0	0
TCGA-IA-A40U-01	1	0	1	1	0	0
TCGA-IA-A40X-01	1	1	1	1	0	0
TCGA-IA-A40Y-01	1	0	1	1	0	1
TCGA-IA-A83S-01	1	1	0	0	0	0
TCGA-IA-A83T-01	1	0	1	0	1	0
TCGA-IA-A83V-01	1	1	0	0	0	0
TCGA-IA-A83W-01	1	0	1	1	0	1
TCGA-IZ-8195-01	1	0	1	0	0	0
TCGA-IZ-8196-01	1	0	1	0	0	0
TCGA-IZ-A6M8-01	1	0	1	0	0	0
TCGA-IZ-A6M9-01	1	1	1	1	0	0
TCGA-J7-6720-01	1	1	0	0	0	0
TCGA-J7-8537-01	1	1	0	0	1	1
TCGA-J7-A8I2-01	1	0	1	1	0	0
TCGA-KV-A6GD-01	1	0	1	1	1	1
TCGA-KV-A6GE-01	1	1	1	1	0	0
TCGA-KV-A74V-01	1	1	1	1	0	0
TCGA-MH-A55W-01	1	0	1	0	0	0
TCGA-MH-A55Z-01	1	0	1	1	0	0
TCGA-MH-A560-01	1	0	1	0	1	0
TCGA-MH-A561-01	1	0	1	0	0	0
TCGA-MH-A562-01	1	1	1	1	0	0
TCGA-MH-A854-01	1	0	1	1	0	1
TCGA-MH-A855-01	1	0	0	0	1	0
TCGA-MH-A856-01	1	0	1	1	0	1
TCGA-MH-A857-01	1	0	1	1	0	0
TCGA-MM-A563-01	1	0	1	1	1	1
TCGA-MM-A564-01	1	0	1	1	1	0
TCGA-MM-A84U-01	1	0	1	1	1	1
TCGA-MW-A4EC-01	1	1	1	1	1	1
TCGA-O9-A75Z-01	1	0	1	1	0	0
TCGA-P4-A5E6-01	1	1	1	0	0	1
TCGA-P4-A5E7-01	1	0	0	1	0	1
TCGA-P4-A5E8-01	1	0	1	1	0	1
TCGA-P4-A5EA-01	1	0	1	0	1	1
TCGA-P4-A5EB-01	1	1	0	0	0	1
TCGA-P4-A5ED-01	1	0	1	1	0	0
TCGA-P4-AAVK-01	1	1	1	0	1	0
TCGA-P4-AAVL-01	1	0	1	1	1	1
TCGA-P4-AAVM-01	1	1	1	0	0	0
TCGA-P4-AAVO-01	1	1	1	0	1	0
TCGA-PJ-A5Z8-01	1	0	1	0	1	1
TCGA-PJ-A5Z9-01	1	0	0	0	0	0
TCGA-Q2-A5QZ-01	1	1	1	1	0	0
TCGA-SX-A71R-01	1	0	1	1	0	1
TCGA-SX-A71S-01	1	0	0	1	0	0
TCGA-SX-A71U-01	1	1	1	1	0	1
TCGA-SX-A71V-01	1	0	0	1	0	0
TCGA-SX-A71W-01	1	0	0	1	0	0
TCGA-SX-A7SL-01	1	0	1	1	0	0
TCGA-SX-A7SM-01	1	0	1	1	1	0
TCGA-SX-A7SN-01	1	0	1	1	0	0
TCGA-SX-A7SO-01	1	1	1	1	1	0
TCGA-SX-A7SP-01	1	1	1	1	0	0
TCGA-SX-A7SQ-01	1	0	1	1	0	1
TCGA-SX-A7SR-01	1	0	1	1	0	1
TCGA-SX-A7SS-01	1	1	1	1	0	0
TCGA-SX-A7SU-01	1	0	1	1	0	0
TCGA-T7-A92I-01	1	0	0	1	0	0
TCGA-UN-AAZ9-01	1	0	1	0	1	0
TCGA-UZ-A9PJ-01	1	0	1	1	0	0
TCGA-UZ-A9PK-01	1	1	0	1	0	1
TCGA-UZ-A9PL-01	1	0	1	1	0	0
TCGA-UZ-A9PM-01	1	0	1	0	0	0
TCGA-UZ-A9PN-01	1	0	1	1	0	1
TCGA-UZ-A9PO-01	1	1	1	0	0	0
TCGA-UZ-A9PP-01	1	0	0	1	0	0
TCGA-UZ-A9PQ-01	1	0	1	1	0	0
TCGA-UZ-A9PR-01	1	0	1	1	1	0
TCGA-UZ-A9PS-01	1	0	0	1	0	0
TCGA-UZ-A9PU-01	1	0	0	1	0	0
TCGA-UZ-A9PV-01	1	0	1	1	0	0
TCGA-UZ-A9PX-01	1	1	0	1	0	0
TCGA-UZ-A9PZ-01	1	0	1	1	0	0
TCGA-UZ-A9Q0-01	1	1	1	1	0	1
TCGA-UZ-A9Q1-01	1	0	0	0	1	0
TCGA-V9-A7HT-01	1	0	1	1	0	1
TCGA-WN-A9G9-01	1	1	1	1	1	0
TCGA-WN-AB4C-01	1	1	1	1	1	0
TCGA-Y8-A894-01	1	0	1	1	0	0
TCGA-Y8-A895-01	1	1	1	1	0	1
TCGA-Y8-A896-01	1	0	0	1	0	0
TCGA-Y8-A897-01	1	0	0	1	0	1
TCGA-Y8-A898-01	1	1	1	1	0	1
TCGA-Y8-A8RY-01	1	0	1	1	0	0
TCGA-Y8-A8RZ-01	1	0	1	1	0	1
TCGA-Y8-A8S0-01	1	0	0	1	0	0
TCGA-Y8-A8S1-01	1	0	0	0	1	0

## Sheet: 6b-e
Tag	Case	DOCK8-AS1	SNHG17	RUSC1-AS1	LINC02609	LUCAT1	LOGIT	Group
TCGA-CW-5585-11	0	4066.47	203.163	60.7891	43.1922	0	2.37811	0
TCGA-B0-5696-11	0	2521.45	225.831	76.586	32.4018	0	2.4042	0
TCGA-CW-5587-11	0	3169.62	212.1	91.627	37.3295	0	2.4405	0
TCGA-CW-5589-11	0	1925.32	280.031	86.419	29.0833	0	2.44967	0
TCGA-CW-6090-11	0	3054.12	198.018	138.256	29.4351	0	2.45613	0
TCGA-CZ-5988-11	0	1740.34	247.901	104.446	8.80866	3.77514	2.48463	0
TCGA-CZ-5466-11	0	2272.03	219.694	40.9599	37.8568	1.86181	2.49789	0
TCGA-CW-5581-11	0	2912.15	176.745	80.6623	33.2139	1.18621	2.49889	0
TCGA-GL-6846-11	0	3134.88	255.283	74.8831	37.4415	0.850944	2.52961	0
TCGA-B0-5690-11	0	2462.02	195.425	62.6363	50.109	0.835151	2.53625	0
TCGA-BQ-5879-11	0	4966.97	279.523	139.387	26.2287	0.749392	2.53836	0
TCGA-DZ-6133-11	0	1818.38	280.988	122.045	34.0591	0	2.54512	0
TCGA-CZ-5463-11	0	277.611	262.372	52.342	41.0785	0	2.54904	0
TCGA-BQ-5877-11	0	3776.25	604.63	70.3285	25.3964	0.976785	2.55654	0
TCGA-B9-4115-11	0	1585.48	681.783	54.0171	39.4179	0	2.56495	0
TCGA-B8-4619-11	0	3929.25	319.882	136.848	41.0544	0	2.57118	0
TCGA-BQ-5894-11	0	4700.09	466.665	69.108	29.7239	1.48619	2.57201	0
TCGA-CJ-5679-11	0	1218.28	324.061	90.1867	40.5076	0	2.57348	0
TCGA-B0-4712-11	0	148.395	307.113	56.1321	22.5819	0.645196	2.57996	0
TCGA-B0-5697-11	0	2090.86	568.599	109.161	29.9894	0	2.58747	0
TCGA-CJ-5678-11	0	2605.98	416.832	73.8031	33.2634	1.03948	2.59715	0
TCGA-CJ-6030-11	0	2353.73	223.267	84.0876	38.4193	1.44979	2.59904	0
TCGA-CZ-5468-11	0	102.377	300.631	52.8136	21.938	0.812517	2.59976	0
TCGA-CJ-5676-11	0	1055.12	338.8	64.0369	23.0831	2.23385	2.60155	0
TCGA-B0-5699-11	0	2963.11	232.832	71.8189	39.3846	2.31674	2.61584	0
TCGA-BQ-7045-11	0	1163.44	283	55.2988	24.9387	4.33716	2.64023	0
TCGA-BQ-5888-11	0	487.848	443.713	110.337	18.915	0.788123	2.64791	0
TCGA-DZ-6131-11	0	457.766	309.605	110.354	22.4796	1.0218	2.65664	0
TCGA-CZ-5462-11	0	122.105	246.296	64.705	47.4851	0	2.65856	0
TCGA-BQ-5884-11	0	4014.8	506.586	98.6741	62.5524	0	2.66255	0
TCGA-CZ-5458-11	0	161.02	329.708	83.2486	25.7413	0.547688	2.66852	0
TCGA-CZ-5470-11	0	79.7667	289.614	53.3823	46.6328	0	2.67112	0
TCGA-CZ-5984-11	0	2575.02	242.334	115.065	38.355	1.74341	2.67588	0
TCGA-BQ-7051-11	0	1800.7	428.532	188.294	35.3503	0	2.68571	0
TCGA-CZ-5455-11	0	104.05	265.362	57.9607	27.9329	1.39664	2.69014	0
TCGA-CJ-5672-11	0	381.688	276.269	69.0673	29.808	2.18107	2.70054	0
TCGA-CZ-5982-11	0	3037.04	185.355	79.8942	55.3933	3.19577	2.70828	0
TCGA-CZ-5985-11	0	2538.5	326.356	70.7372	40.1916	3.21533	2.71117	0
TCGA-BQ-5878-11	0	4590.83	465.658	80.446	67.2961	0.773519	2.71282	0
TCGA-CZ-5986-11	0	1600.72	468.449	107.4	35.4193	1.14256	2.72925	0
TCGA-CZ-5989-11	0	103.3	305.134	75.4888	30.9901	0.794619	2.73019	0
TCGA-CJ-5677-11	0	1776.33	501.333	127.323	15.0312	4.42093	2.73619	0
TCGA-BQ-5882-11	0	4126.14	254.159	144.608	39.4385	2.62923	2.74137	0
TCGA-BQ-5891-11	0	2568.05	280.669	84.0507	47.2785	3.00181	2.74437	0
TCGA-B0-5709-11	0	2898.78	350.97	130.36	30.0832	3.08545	2.75387	0
TCGA-B0-5691-11	0	1382.69	253.196	102.201	42.8587	2.63746	2.76844	0
TCGA-B0-5402-11	0	941.185	280.915	78.4321	47.2193	2.40098	2.77098	0
TCGA-CZ-5461-11	0	674.64	509.374	43.0872	37.7751	3.54142	2.77144	0
TCGA-CZ-5456-11	0	180.848	364.299	107.989	24.7203	1.30107	2.77388	0
TCGA-A3-3387-11	0	2916.35	347.356	101.312	25.3281	7.23659	2.78462	0
TCGA-CW-6087-11	0	574.387	595.986	127.197	17.5996	2.39995	2.78938	0
TCGA-CZ-5465-11	0	72.9313	248.714	72.9313	31.1672	1.87003	2.79368	0
TCGA-CW-6088-11	0	60.0488	279.656	130.392	21.1601	1.14379	2.79791	0
TCGA-B0-5711-11	0	1001.7	289.004	71.7435	33.1644	6.09143	2.79955	0
TCGA-CZ-5451-11	0	2275.76	428.629	104.043	44.6946	2.1981	2.79971	0
TCGA-B0-5694-11	0	1055.95	352.56	97.8853	38.9809	2.59872	2.80243	0
TCGA-CW-5584-11	0	334.974	618.414	57.0561	36.8104	1.84052	2.81121	0
TCGA-CZ-5469-11	0	193.417	568.647	66.4066	24.4995	2.5789	2.8149	0
TCGA-A4-A57E-11	0	666.098	546.286	175.439	44.2164	0	2.81595	0
TCGA-Y8-A8RY-11	0	75.1405	487.433	165.962	16.9883	0.653395	2.81666	0
TCGA-CZ-5452-11	0	79.4339	270.87	81.8169	46.0717	0.794339	2.82505	0
TCGA-BQ-5875-11	0	820.651	438.736	84.8702	43.8736	2.15772	2.82743	0
TCGA-B0-5706-11	0	216.677	466.611	147.139	25.195	1.0078	2.83176	0
TCGA-CJ-6033-11	0	420.648	655.454	80.1234	28.9335	2.22565	2.83396	0
TCGA-B2-5636-11	0	2767.72	219.191	115.684	50.4487	5.21883	2.8436	0
TCGA-CZ-5453-11	0	101.43	378.631	83.1603	35.9101	1.26	2.84367	0
TCGA-B0-5705-11	0	606.491	417.333	78.038	44.1084	2.54472	2.84489	0
TCGA-B8-4622-11	0	2935.56	411.394	73.973	107.715	1.29777	2.84814	0
TCGA-BQ-7046-11	0	1666.62	678.073	111.303	46.1324	1.46452	2.85931	0
TCGA-CZ-5987-11	0	516.962	345.521	46.1574	46.1574	6.59391	2.86914	0
TCGA-CZ-4864-11	0	2569.85	621.217	116.425	72.2345	0.849817	2.87414	0
TCGA-B8-5552-11	0	114.386	339.957	46.3941	11.1986	25.5968	2.87932	0
TCGA-BQ-7044-11	0	1555.63	545.956	113.947	69.3592	0.990846	2.88816	0
TCGA-DZ-6134-11	0	1605.39	295.477	86.622	80.8472	2.8874	2.89234	0
TCGA-B8-4620-11	0	228.364	646.313	68.9401	47.3963	1.43625	2.90138	0
TCGA-CJ-5689-11	0	122.263	363.484	58.3778	42.9572	3.3044	2.90382	0
TCGA-CZ-5457-11	0	118.944	438.56	83.1877	24.0806	4.3783	2.90975	0
TCGA-B0-4700-11	0	2531.16	386.261	342.775	42.2073	1.27901	2.91938	0
TCGA-BQ-5890-11	0	2419.51	303.874	126.32	67.1349	3.53342	2.92072	0
TCGA-CZ-4863-11	0	199.174	231.14	98.9723	32.5809	6.14735	2.92519	0
TCGA-P4-A5E8-11	0	224.455	768.238	196.687	39.3375	0	2.92797	0
TCGA-BQ-7055-11	0	705.161	382.55	207.141	39.6653	1.7629	2.93049	0
TCGA-BQ-7059-11	0	2337.41	411.845	261.871	33.4138	3.10826	2.93209	0
TCGA-GL-A59R-11	0	151.709	807.029	314.366	23.4602	0	2.93627	0
TCGA-CZ-5454-11	0	106.558	322.791	110.196	29.1084	3.63855	2.93802	0
TCGA-P4-A5ED-11	0	191.857	835.946	157.596	26.4292	0.97886	2.9384	0
TCGA-B0-5703-11	0	566.851	475.95	87.8363	56.1744	3.06406	2.95855	0
TCGA-B8-5549-11	0	85.914	502.873	77.2438	29.1635	3.94101	2.96155	0
TCGA-CW-5580-11	0	68.7963	357.741	160.525	30.1393	1.96561	2.98105	0
TCGA-A3-3358-11	0	3997	574.63	159.687	61.6971	3.62924	3.00192	0
TCGA-B0-5701-11	0	288.443	309.231	81.4223	39.8449	9.52814	3.00976	0
TCGA-A4-A4ZT-11	0	95.9939	532.33	285.488	22.4401	1.24667	3.01061	0
TCGA-B2-5641-11	0	83.5686	506.327	153.373	24.579	2.94948	3.01244	0
TCGA-CZ-4865-11	0	150.98	348.093	115.751	38.5838	5.03266	3.03324	0
TCGA-DZ-6132-11	0	428.375	422.537	171.496	40.1373	4.37862	3.05086	0
TCGA-GL-7966-11	0	341.586	553.729	147.421	25.1695	8.38983	3.0696	0
TCGA-B0-5712-11	0	189.25	745.53	79.4686	63.9026	2.45779	3.07379	0
TCGA-BQ-5887-11	0	635.347	398.19	120.774	29.2786	23.4229	3.13179	1
TCGA-CZ-5467-11	0	119.452	858.192	68.6215	27.9569	15.2492	3.17274	1
TCGA-BQ-7061-11	0	181.482	841.572	124.805	54.9598	4.00749	3.19807	1
TCGA-GL-A9DE-11	0	141.628	937.648	429.151	22.1827	2.55955	3.20417	1
TCGA-CJ-5681-11	0	1372.15	549.315	234.77	44.4467	39.8881	3.4073	1
TCGA-CJ-5680-11	0	283.643	585.115	123.993	47.0037	132.907	3.60521	1
TCGA-CW-5591-11	0	201.34	397.163	75.3874	304.308	36.7743	3.67545	1
TCGA-CW-5591-01	1	328.371	185.801	27.5942	15.6367	0	2.18917	0
TCGA-A4-8515-01	1	435.03	268.807	142.477	1.89969	0.949847	2.24199	0
TCGA-G7-6790-01	1	807.861	243.58	34.3608	2.29072	11.4536	2.26476	0
TCGA-B9-5155-01	1	144.307	297.923	75.2566	6.98257	0	2.32289	0
TCGA-BQ-7055-01	1	167.485	473.785	134.29	3.01774	0	2.33288	0
TCGA-P4-A5EB-01	1	745.378	240.382	68.819	0.969282	36.8327	2.45429	0
TCGA-DZ-6133-01	1	65.3431	251.365	111.26	7.06412	0.588677	2.49226	0
TCGA-B8-5546-01	1	389.08	483.623	60.6044	20.6055	0	2.49672	0
TCGA-BQ-7060-01	1	558.866	508.866	101.612	4.83867	4.83867	2.57416	0
TCGA-A4-8518-01	1	498.408	370.909	88.8635	5.79545	9.65908	2.64192	0
TCGA-BQ-7051-01	1	247.348	406.641	111.801	1.97879	16.325	2.64307	0
TCGA-BQ-5886-01	1	748.578	518.992	63.0551	4.8504	16.168	2.64693	0
TCGA-A4-8312-01	1	30.7509	386.095	201.589	7.97246	0	2.64982	0
TCGA-GL-8500-01	1	295.485	348.106	103.217	20.2387	1.01194	2.66739	0
TCGA-MH-A561-01	1	301.481	682.405	88.6108	4.07406	8.14812	2.67173	0
TCGA-B9-7268-01	1	113.709	612.213	91.4612	12.3596	0.823975	2.67229	0
TCGA-5P-A9JZ-01	1	222.371	572.048	224.025	4.1333	2.47998	2.67684	0
TCGA-B9-5156-01	1	483.685	540.143	28.6504	6.74126	30.3357	2.70003	0
TCGA-A4-7584-01	1	215.044	439.048	504.756	2.98672	1.99115	2.70674	0
TCGA-G7-6792-01	1	434.046	456.79	86.2405	3.79079	19.9017	2.70729	0
TCGA-SX-A7SL-01	1	299.468	1669.37	393.45	1.59291	1.59291	2.71268	0
TCGA-BQ-7044-01	1	266.471	566.824	115.379	0.915709	35.7127	2.71539	0
TCGA-MH-A55Z-01	1	236.981	1046.44	295.56	7.98811	0	2.72356	0
TCGA-A4-7288-01	1	273.637	241.998	117.151	32.4944	0.855115	2.72684	0
TCGA-G7-6797-01	1	181.421	627.307	81.7671	7.66566	5.11044	2.72698	0
TCGA-A4-7583-01	1	256.864	673.631	166.707	1.70109	14.4593	2.74008	0
TCGA-CW-5585-01	1	2400.09	341.33	141.562	24.432	3.59295	2.75293	0
TCGA-B0-4834-01	1	225.313	414.027	100.647	25.1618	1.14372	2.75761	0
TCGA-BQ-5883-01	1	3.2538	1011.93	55.3146	13.0152	0	2.78125	0
TCGA-HE-7129-01	1	165.037	503.638	154.075	9.7439	3.04497	2.79183	0
TCGA-A4-8310-01	1	221.314	655.944	131.989	11.999	2.66644	2.80686	0
TCGA-AK-3443-01	1	538.524	557.51	197.631	35.3838	0	2.8075	0
TCGA-B8-4619-01	1	333.7	374.315	111.965	38.4194	1.0977	2.81931	0
TCGA-5P-A9KH-01	1	302.619	526.048	202.689	11.3129	2.82821	2.82623	0
TCGA-UZ-A9PS-01	1	171.408	628.497	206.036	1.7314	18.1797	2.82933	0
TCGA-B9-4617-01	1	295.285	844.881	279.743	18.367	0	2.8311	0
TCGA-B1-5398-01	1	548.934	386.851	46.5654	9.85037	37.6105	2.83186	0
TCGA-EV-5903-01	1	159.14	324.503	49.7868	26.6715	7.1124	2.84773	0
TCGA-EV-5902-01	1	80.7406	1079.17	248.786	2.62571	4.59499	2.84847	0
TCGA-DZ-6135-01	1	301.569	361.39	186.245	5.55036	15.4177	2.85842	0
TCGA-J7-6720-01	1	496.057	294.44	35.9317	41.9203	10.9791	2.85976	0
TCGA-A4-8630-01	1	227.273	265.644	305.983	5.9032	9.83867	2.86575	0
TCGA-IZ-8196-01	1	86.4954	638.735	186.298	2.21783	15.5248	2.86834	0
TCGA-A3-3328-01	1	535.619	441.574	149.151	15.4294	6.61259	2.88157	0
TCGA-2Z-A9JN-01	1	7.40141	1015.05	164.946	10.5734	0	2.8857	0
TCGA-B1-A655-01	1	188.512	335.517	72.6376	12.1063	19.0241	2.89245	0
TCGA-BP-4177-01	1	36.9878	518.633	50.6571	38.5959	1.60816	2.90276	0
TCGA-SX-A71V-01	1	309.378	596.799	250.496	8.98193	4.98996	2.90546	0
TCGA-B1-A657-01	1	354.537	574.648	187.095	5.50278	14.9361	2.90601	0
TCGA-A4-A5XZ-01	1	276.824	382.625	121.744	94.207	0	2.91598	0
TCGA-B0-5083-01	1	513.99	530.438	28.7835	56.1963	8.22385	2.91927	0
TCGA-AK-3433-01	1	362.555	777.607	147.647	18.0457	3.28104	2.92218	0
TCGA-A4-7734-01	1	81.7477	652.138	98.9577	7.99037	10.449	2.92247	0
TCGA-B0-5705-01	1	2440.1	515.628	103.71	43.0907	5.84281	2.93249	0
TCGA-UZ-A9PQ-01	1	304.37	1670.06	333.483	2.64669	7.05785	2.93321	0
TCGA-MH-A857-01	1	6.16972	1446.8	196.403	3.08486	2.05657	2.93321	0
TCGA-A4-A48D-01	1	543.923	834.859	68.6681	10.8423	21.6847	2.93821	0
TCGA-Y8-A8S0-01	1	301.175	576.323	311.401	13.0138	2.78866	2.93866	0
TCGA-DW-7837-01	1	278.258	695.645	144.188	13.9129	6.32405	2.95339	0
TCGA-CJ-4897-01	1	552.305	290.099	114.676	36.5724	7.43844	2.96601	0
TCGA-AK-3456-01	1	516.171	313.346	100.805	31.5775	9.71616	2.96658	0
TCGA-IA-A40X-01	1	714.16	687.408	231.462	36.0569	1.16313	2.97094	0
TCGA-GL-A59T-01	1	314.635	659.423	94.3906	7.86589	27.5306	2.97121	0
TCGA-DW-7836-01	1	187.95	700.879	139.805	12.0362	8.33277	2.98427	0
TCGA-B1-7332-01	1	425.444	1269.2	62.9848	17.8259	10.6955	2.98876	0
TCGA-A4-8516-01	1	100.376	577.162	246.576	10.9104	4.36417	2.98936	0
TCGA-B0-5117-01	1	341.455	852.88	235.225	16.6934	3.03516	2.99435	0
TCGA-BP-4795-01	1	19.0685	253.453	70.7125	42.9042	3.17809	2.99876	0
TCGA-DW-7963-01	1	334.219	657.42	194.655	3.67274	36.7274	3.00196	0
TCGA-GL-A9DC-01	1	588.21	677.1	266.67	4.38962	27.4352	3.00946	0
TCGA-2Z-A9JQ-01	1	261.109	777.11	276.651	15.5422	3.10844	3.0156	0
TCGA-B3-A6W5-01	1	252.767	748.811	209.633	16.391	4.31343	3.01567	0
TCGA-5P-A9K8-01	1	127.692	359.133	179.566	58.2593	0.798073	3.01718	0
TCGA-A4-8311-01	1	76.3343	989.165	469.138	7.95149	1.5903	3.01721	0
TCGA-IZ-8195-01	1	318.865	1007.18	70.5182	15.33	15.33	3.01783	0
TCGA-HE-7128-01	1	140.741	712.573	68.7084	25.4886	7.7574	3.02096	0
TCGA-5P-A9JY-01	1	600.391	1028.29	536.206	10.6974	2.67435	3.02526	0
TCGA-BQ-7048-01	1	181.058	1584.6	106.185	12.2521	6.80671	3.02613	0
TCGA-DZ-6134-01	1	232.731	249.167	58.5115	40.7608	17.0932	3.02751	0
TCGA-AT-A5NU-01	1	144.532	1088.09	625.279	7.68785	1.53757	3.03003	0
TCGA-UZ-A9PV-01	1	9.31753	934.859	534.982	3.8823	1.55292	3.03241	0
TCGA-BP-5176-01	1	1476.81	254.371	70.4785	34.8342	38.8847	3.0367	0
TCGA-2Z-A9JS-01	1	185.985	1240.14	224.489	5.81202	10.171	3.03753	0
TCGA-CZ-5451-01	1	1511.58	527.853	83.9767	55.6209	8.72485	3.03782	0
TCGA-CW-5581-01	1	1218.53	218.755	67.5064	244.39	2.56354	3.04191	0
TCGA-BP-4762-01	1	129.583	295.807	38.4282	33.9598	25.9167	3.04229	0
TCGA-CJ-4905-01	1	509.521	368.636	73.7273	41.6085	13.8695	3.04366	0
TCGA-BQ-7062-01	1	294.738	796.365	157.236	24.1901	4.45608	3.0462	0
TCGA-DV-5567-01	1	7.84427	317.693	62.7542	19.6107	9.41312	3.04779	0
TCGA-KV-A74V-01	1	1005.17	685.438	255.995	56.4233	1.04488	3.04871	0
TCGA-A3-3313-01	1	875.266	1503.06	411.583	3.47328	17.3664	3.06033	0
TCGA-F9-A7VF-01	1	388.026	1777.53	229.12	5.54322	12.9342	3.06983	0
TCGA-2Z-A9J1-01	1	247.682	775.827	193.046	10.9271	12.1413	3.07166	0
TCGA-A4-7997-01	1	132.967	344.589	180.41	4.36979	63.6741	3.07344	0
TCGA-IA-A83V-01	1	468.615	575.634	108.641	24.3226	14.5935	3.07527	1
TCGA-5P-A9KC-01	1	1235.98	448.534	242.08	13.7027	23.7513	3.07666	1
TCGA-IA-A83S-01	1	339.239	408.438	118.143	23.6286	16.8776	3.07923	1
TCGA-UZ-A9PM-01	1	260.083	1027.41	58.1552	16.1542	24.2313	3.07955	1
TCGA-BQ-7053-01	1	300.323	387.454	119.264	83.4231	2.4718	3.08021	1
TCGA-UZ-A9PX-01	1	441.401	499.246	442.291	13.3488	7.11937	3.08056	1
TCGA-F9-A97G-01	1	1027.19	436.08	56.88	30.1129	42.3811	3.08064	1
TCGA-HE-A5NH-01	1	321.197	388.195	187.2	15.7642	17.7348	3.08219	1
TCGA-A4-A4ZT-01	1	180.986	451.074	247.812	9.74542	16.7064	3.08596	1
TCGA-B0-5707-01	1	336.346	730.448	63.4187	29.4444	15.8547	3.08745	1
TCGA-B4-5835-01	1	1467.75	1143.02	88.9774	40.306	9.12589	3.09577	1
TCGA-G7-7501-01	1	177.069	450.304	142.724	46.5569	3.81614	3.09714	1
TCGA-B4-5378-01	1	15.4711	727.142	154.711	8.43879	8.43879	3.09747	1
TCGA-IZ-A6M8-01	1	318.06	2121.34	92.4757	16.8138	8.40688	3.09755	1
TCGA-CJ-4874-01	1	940.109	306.358	80.4762	82.3052	10.974	3.1001	1
TCGA-A3-3363-01	1	55.615	373.817	285.819	16.8957	5.6319	3.11142	1
TCGA-BQ-5875-01	1	369.368	424.619	87.9934	45.0199	12.2781	3.11211	1
TCGA-DW-7839-01	1	12.8661	452.458	213.005	16.44	3.57392	3.11281	1
TCGA-B9-A8YI-01	1	383.299	2393.16	113.024	9.82818	14.7423	3.11387	1
TCGA-BP-4976-01	1	496.78	360.845	77.2357	53.1382	15.4471	3.11627	1
TCGA-2Z-A9JE-01	1	14.2644	1621.38	209.211	13.0757	1.1887	3.11703	1
TCGA-2Z-A9J2-01	1	326.09	1053.52	258.006	71.6682	0	3.11718	1
TCGA-BP-5174-01	1	784.597	404.512	165.127	59.602	5.8625	3.11902	1
TCGA-UZ-A9PP-01	1	209.433	557.155	298.961	8.79297	16.7866	3.11929	1
TCGA-GL-7773-01	1	55.7152	567.469	155.796	3.09529	66.0328	3.1204	1
TCGA-CJ-4640-01	1	567.119	509.08	119.393	36.4813	12.4368	3.12095	1
TCGA-B8-5165-01	1	592.379	292.903	100.799	48.2084	17.5303	3.12112	1
TCGA-B9-A5W7-01	1	338.409	912.572	133.972	13.9191	19.1388	3.12501	1
TCGA-B0-5691-01	1	608.101	321.261	96.8882	66.2919	11.4736	3.12819	1
TCGA-DW-7842-01	1	123.328	679.706	248.758	33.6349	2.10218	3.13675	1
TCGA-P4-A5E6-01	1	506.646	635.518	185.728	6.31728	61.9093	3.13698	1
TCGA-5P-A9KF-01	1	299.934	1122.85	491.664	5.69494	11.3899	3.14185	1
TCGA-B0-5709-01	1	954.078	374.869	68.3585	145.537	6.61534	3.14533	1
TCGA-BQ-5884-01	1	220.269	648.505	117.75	67.9553	2.92911	3.14543	1
TCGA-G6-A8L8-01	1	477.036	956.201	839.072	7.45368	6.38887	3.15004	1
TCGA-SX-A7SN-01	1	126.186	1015.03	224.638	5.54662	23.5731	3.15102	1
TCGA-B0-5711-01	1	543.949	351.567	81.7201	80.0176	11.0663	3.15193	1
TCGA-AK-3447-01	1	165.57	2115.99	86.0964	36.4254	3.3114	3.15857	1
TCGA-P4-AAVM-01	1	530.729	1041.04	114.821	51.0316	5.10316	3.16029	1
TCGA-BQ-7045-01	1	202.34	541.558	113.072	8.92678	65.463	3.16056	1
TCGA-B3-3925-01	1	93.1008	379.122	291.78	10.5578	18.2362	3.16104	1
TCGA-AK-3440-01	1	422.001	613.412	119.772	41.4165	10.0743	3.16121	1
TCGA-GL-6846-01	1	508.177	266.265	112.838	168.851	3.24714	3.16369	1
TCGA-5P-A9KE-01	1	425.4	1020.29	158.262	25.8158	8.97941	3.16609	1
TCGA-BQ-5876-01	1	1767.71	951.723	91.0075	104.89	4.6275	3.16666	1
TCGA-CJ-4644-01	1	1116.86	454.547	57.5499	112.174	12.6805	3.17061	1
TCGA-B9-A69E-01	1	173.466	1077.9	207.557	15.0404	9.02424	3.17105	1
TCGA-SX-A71U-01	1	562.062	723.612	339.929	4.48752	54.9721	3.17406	1
TCGA-AK-3465-01	1	259.148	1187.03	284.383	19.4118	4.85295	3.17854	1
TCGA-HE-7130-01	1	50.9142	1033.42	211.913	23.393	2.75212	3.17908	1
TCGA-B4-5836-01	1	1063.96	402.844	64.9749	88.5282	17.8681	3.17972	1
TCGA-DV-5576-01	1	222.134	846.466	122.006	29.4496	10.097	3.18049	1
TCGA-SX-A7SP-01	1	366.404	1553.67	284.034	9.46781	12.3082	3.18313	1
TCGA-2Z-A9J3-01	1	276.923	696.288	281.346	13.2711	15.0405	3.1838	1
TCGA-CW-5587-01	1	944.733	277.441	118.789	73.3464	15.9449	3.18419	1
TCGA-BP-4760-01	1	16.0029	443.637	68.457	23.1154	16.892	3.18458	1
TCGA-A4-A772-01	1	738.952	490.188	306.673	14.6812	25.2842	3.18558	1
TCGA-B8-5164-01	1	1139.68	431.663	85.3117	62.7077	21.1456	3.1856	1
TCGA-2Z-A9JO-01	1	864.709	590.054	114.691	89.0364	6.03636	3.18821	1
TCGA-CW-5583-01	1	268.151	405.793	120.526	40.6506	14.9765	3.18882	1
TCGA-BQ-7059-01	1	558.231	443.052	89.741	36.7443	30.3847	3.18919	1
TCGA-BP-5184-01	1	2240.35	355.19	122.441	99.2768	12.1338	3.19013	1
TCGA-CW-5589-01	1	468.637	405.284	91.1239	26.0354	47.7315	3.19055	1
TCGA-Y8-A896-01	1	107.179	460.974	297.604	8.32459	26.0144	3.19095	1
TCGA-Y8-A894-01	1	80.2205	814.474	319.938	10.3815	9.43771	3.19126	1
TCGA-UZ-A9Q1-01	1	133.339	264.38	95.4067	462.09	0	3.2006	1
TCGA-UZ-A9Q0-01	1	343.815	1022.22	662.248	2.30748	36.9197	3.20108	1
TCGA-CZ-4859-01	1	827.818	325.355	163.989	78.0589	9.1834	3.20247	1
TCGA-B4-5844-01	1	902.574	465.314	92.8693	79.3259	13.5434	3.20744	1
TCGA-SX-A7SQ-01	1	74.3486	1008.6	199.567	3.91308	46.957	3.20878	1
TCGA-BQ-5880-01	1	1403.78	527.148	52.7148	199.145	7.80961	3.21091	1
TCGA-B0-5697-01	1	204.712	580.742	81.3039	24.6816	34.8445	3.21384	1
TCGA-B9-A5W9-01	1	279.668	2154.42	128.903	60.3057	1.50764	3.2146	1
TCGA-A4-7996-01	1	166.929	362.205	144.357	16.7979	42.5197	3.21511	1
TCGA-B4-5834-01	1	314.687	540.111	71.1071	84.7233	9.83396	3.21654	1
TCGA-B3-4103-01	1	292.257	506.318	491.656	6.84214	31.2783	3.21871	1
TCGA-T7-A92I-01	1	93.1963	539.105	356.296	48.0319	1.43379	3.21935	1
TCGA-UZ-A9PZ-01	1	90.7929	983.59	532.652	3.02643	24.2115	3.21958	1
TCGA-BQ-5881-01	1	1040.74	1722.41	96.0096	40.324	11.5211	3.22055	1
TCGA-DW-7838-01	1	318.721	575.916	53.4563	14.1205	144.231	3.22282	1
TCGA-UZ-A9PJ-01	1	177.932	649.837	314.281	10.6372	20.3074	3.22391	1
TCGA-2Z-A9JP-01	1	1798.9	1476.62	244.639	60.0611	2.92981	3.22447	1
TCGA-DZ-6132-01	1	82.9716	479.561	54.807	32.7319	33.4931	3.22855	1
TCGA-2Z-A9JG-01	1	167.926	717.045	157.011	50.3778	5.03778	3.23237	1
TCGA-BP-5173-01	1	570.325	743.336	151.275	53.0333	8.69399	3.23801	1
TCGA-BQ-7050-01	1	1060.9	332.253	175.59	138.789	5.25717	3.24347	1
TCGA-BP-4782-01	1	362.301	632.903	67.4257	21.5762	76.4158	3.25165	1
TCGA-B0-5119-01	1	830.59	428.086	123.65	75.043	15.3497	3.25763	1
TCGA-BP-4325-01	1	2324.92	421.834	529.708	35.4212	12.8804	3.26161	1
TCGA-BQ-5892-01	1	693.796	276.225	42.4962	221.719	16.6289	3.26291	1
TCGA-A4-7732-01	1	167.385	759.951	322.551	10.9961	20.7704	3.26344	1
TCGA-2Z-A9JD-01	1	633.174	619.955	175.808	54.1965	10.5749	3.26487	1
TCGA-HE-A5NF-01	1	283.982	991.784	90.3578	62.3899	8.6055	3.26524	1
TCGA-Y8-A895-01	1	537.965	723.149	520.377	6.20729	42.4165	3.26741	1
TCGA-B8-5553-01	1	450.259	297.153	70.6644	94.2192	24.4608	3.26772	1
TCGA-A4-7286-01	1	456.574	290.159	85.3409	174.949	8.53409	3.26921	1
TCGA-B8-A54K-01	1	10.6006	806.613	318.019	23.1287	1.92739	3.27	1
TCGA-BP-4334-01	1	347.371	1536.79	490.276	28.5811	2.19855	3.27164	1
TCGA-A3-A8OW-01	1	682.795	876.329	356.319	75.0622	1.80873	3.27308	1
TCGA-SX-A71S-01	1	121.088	471.827	309.819	25.8879	10.8562	3.28464	1
TCGA-A3-3374-01	1	1019.21	1935.76	103.9	12.3691	68.0298	3.28505	1
TCGA-HE-A5NK-01	1	242.397	667.146	142.325	11.1191	77.8337	3.2858	1
TCGA-EU-5906-01	1	1047.6	327.04	82.5018	46.8895	78.9406	3.29025	1
TCGA-B9-A5W8-01	1	420.613	729.722	111.505	74.8071	9.88018	3.29135	1
TCGA-B8-4146-01	1	1363.6	130.659	168.668	46.3244	91.4611	3.29194	1
TCGA-EV-5901-01	1	79.637	390.683	188.705	19.6207	29.4311	3.293	1
TCGA-2Z-A9JR-01	1	357.641	505.033	398.824	26.0103	13.0051	3.29582	1
TCGA-BP-5192-01	1	338.144	652.752	92.5777	61.1955	17.2603	3.29843	1
TCGA-UZ-A9PK-01	1	336.794	621.198	257.273	9.35539	66.4233	3.29976	1
TCGA-A3-3373-01	1	1079.46	276.621	133.688	35.5554	83.1995	3.30026	1
TCGA-B8-4621-01	1	484.626	466.532	169.934	37.7631	26.7489	3.30137	1
TCGA-2Z-A9J6-01	1	470.036	652.1	308.201	33.319	11.8996	3.30571	1
TCGA-B8-5545-01	1	291.073	663.613	45.8249	59.4027	39.8847	3.31111	1
TCGA-CZ-4856-01	1	395.099	222.969	53.0187	92.9644	55.9239	3.31199	1
TCGA-SX-A71W-01	1	69.8347	597.91	228.336	25.1091	12.5545	3.31409	1
TCGA-B8-4151-01	1	1312.67	666.304	174.788	295.614	1.17307	3.31441	1
TCGA-G7-A4TM-01	1	154.976	1265.2	215.391	37.6496	5.25344	3.31581	1
TCGA-2Z-A9JM-01	1	206.151	1165.25	217.175	17.6386	18.741	3.31682	1
TCGA-5P-A9K6-01	1	1019.71	1122.18	213.988	63.2921	7.03246	3.32369	1
TCGA-B2-5636-01	1	34.8656	373.429	116.525	75.2364	7.34013	3.32454	1
TCGA-HE-A5NL-01	1	224.741	472.732	478.544	25.1865	11.6245	3.32518	1
TCGA-IA-A83T-01	1	318.061	706.172	72.889	107.914	11.3593	3.32754	1
TCGA-AK-3450-01	1	1208.91	441.23	291.644	60.2105	14.1118	3.32816	1
TCGA-BP-4784-01	1	52.5637	497.408	60.3509	76.8987	14.601	3.32845	1
TCGA-SX-A7SS-01	1	507.46	1004.77	570.047	57.5122	1.69153	3.33065	1
TCGA-AK-3427-01	1	290.451	1445.34	59.4732	195.017	2.7662	3.33179	1
TCGA-O9-A75Z-01	1	101.486	1039.29	299.76	20.6731	9.39687	3.33235	1
TCGA-CZ-5989-01	1	526.903	105.381	149.751	127.566	29.1183	3.33489	1
TCGA-BP-4965-01	1	242.178	256.15	153.172	47.6076	35.1882	3.3351	1
TCGA-SX-A7SR-01	1	238.691	704.43	421.494	8.15043	44.2452	3.33561	1
TCGA-CW-6088-01	1	907.924	321.981	190.638	47.1814	39.5304	3.33562	1
TCGA-BP-4789-01	1	645.059	297.659	146.856	60.795	35.5296	3.33733	1
TCGA-A4-7828-01	1	38.0162	274.984	125.453	12.6721	108.98	3.33804	1
TCGA-Y8-A897-01	1	204.635	552.409	251.288	14.844	44.532	3.33836	1
TCGA-GL-A59R-01	1	221.5	800.692	258.915	17.9595	25.4426	3.34099	1
TCGA-CJ-5675-01	1	1476.36	253.456	98.1396	182.625	21.3347	3.34288	1
TCGA-5P-A9K4-01	1	302.187	1506.52	399.24	8.82298	25.3661	3.34475	1
TCGA-HE-A5NI-01	1	279.275	622.604	561.112	10.2486	30.7459	3.3455	1
TCGA-G7-A8LB-01	1	379.038	1620.26	546.595	43.9228	1.62677	3.34835	1
TCGA-MH-A55W-01	1	255.739	1446.46	167.765	32.7347	12.2755	3.34939	1
TCGA-BP-4962-01	1	750.736	388.129	99.4527	203.306	9.68123	3.35253	1
TCGA-4A-A93W-01	1	159.69	1699.76	352.689	20.5735	6.85784	3.35384	1
TCGA-B9-A8YH-01	1	385.357	1029.52	379.637	19.3036	16.4438	3.35491	1
TCGA-BP-4970-01	1	162.23	291.789	91.2545	72.1023	30.9815	3.35501	1
TCGA-B0-5812-01	1	494.789	334.911	81.8334	75.0139	48.4938	3.36098	1
TCGA-BQ-7046-01	1	225.264	1083.41	116.804	104.885	4.7675	3.36295	1
TCGA-B1-A654-01	1	101.573	3538.54	186.64	36.8201	2.53932	3.36434	1
TCGA-B4-5838-01	1	842.631	267.176	33.5322	315.852	30.2871	3.37001	1
TCGA-MH-A855-01	1	309.97	529.733	129.554	125.716	8.63694	3.38109	1
TCGA-G7-6795-01	1	536.317	1123.38	297.649	28.8047	16.4598	3.38393	1
TCGA-DV-5574-01	1	258.833	444.443	49.3825	80.0337	54.4911	3.38611	1
TCGA-V9-A7HT-01	1	194.986	1117.02	227.138	11.4088	49.7837	3.38643	1
TCGA-P4-AAVK-01	1	423.161	1292.88	98.4775	144.304	4.87512	3.38652	1
TCGA-J7-A8I2-01	1	147.068	3629.49	1005.87	29.0504	0	3.38853	1
TCGA-B0-4839-01	1	612.785	446.669	92.287	121.819	23.3794	3.39576	1
TCGA-B0-5713-01	1	912.614	530.346	172.222	70.0154	24.948	3.39659	1
TCGA-BP-5170-01	1	230.01	572.725	35.6516	356.516	8.05035	3.39701	1
TCGA-CZ-5458-01	1	1159.13	332.705	77.8348	145.749	38.1543	3.39744	1
TCGA-UZ-A9PU-01	1	238.068	353.059	506.68	26.9511	22.4592	3.40292	1
TCGA-2Z-A9JL-01	1	134.756	920.647	418.991	9.05926	39.6343	3.41045	1
TCGA-UZ-A9PR-01	1	230.067	752.142	345.101	86.8784	3.21772	3.41049	1
TCGA-IZ-A6M9-01	1	366.955	1097.2	457.471	18.3478	19.571	3.415	1
TCGA-BP-5182-01	1	403.824	553.417	86.8106	59.6823	51.9313	3.41624	1
TCGA-P4-A5E7-01	1	301.115	498.779	197.664	12.0076	160.718	3.41703	1
TCGA-BP-5202-01	1	986.283	452.017	91.2329	136.849	28.3375	3.41828	1
TCGA-G7-6796-01	1	155.553	1245.91	158.516	35.555	17.7775	3.42237	1
TCGA-CJ-5681-01	1	133.042	241.031	71.7045	95.03	47.515	3.42295	1
TCGA-BP-4769-01	1	20.9326	536.056	159.269	37.3146	15.4719	3.42296	1
TCGA-B9-4113-01	1	199.481	749.444	601.621	15.8949	19.8686	3.42319	1
TCGA-BQ-5891-01	1	135.56	900.256	118.18	134.169	4.86625	3.42568	1
TCGA-B4-5843-01	1	264.234	571.211	148.631	76.7443	17.486	3.42599	1
TCGA-AK-3429-01	1	864.733	1259.31	66.6165	204.974	8.96761	3.42646	1
TCGA-BP-4797-01	1	935.948	342.698	60.9242	137.079	58.6395	3.42693	1
TCGA-B0-5100-01	1	23.8778	1757.61	182.717	34.2595	5.19083	3.42926	1
TCGA-MH-A856-01	1	259.533	1241.1	600.586	1.66367	179.677	3.42975	1
TCGA-BP-4807-01	1	575.079	440.704	54.661	56.9385	142.346	3.43088	1
TCGA-PJ-A5Z9-01	1	135.988	611.165	175.065	57.8341	15.6308	3.43091	1
TCGA-BP-5181-01	1	1479.56	352.492	68.6908	123.824	72.3061	3.43344	1
TCGA-B0-4816-01	1	674.469	725.668	239.614	39.5943	31.4024	3.43408	1
TCGA-2Z-A9J9-01	1	6.63743	852.08	306.151	19.9123	7.46711	3.43539	1
TCGA-BP-5186-01	1	826.963	608.414	202.538	81.6556	18.4125	3.43559	1
TCGA-A4-8517-01	1	212.583	1039.56	143.669	74.7546	10.5124	3.43576	1
TCGA-BP-4982-01	1	998.234	382.019	322.89	45.7959	39.9989	3.43973	1
TCGA-BP-4163-01	1	606.283	401.783	212.921	76.9884	25.2618	3.44293	1
TCGA-B3-3926-01	1	28.584	238.2	177.856	99.5146	9.528	3.44295	1
TCGA-SX-A7SU-01	1	326.077	1145.03	754.994	21.3204	10.0331	3.44678	1
TCGA-BP-4994-01	1	139.387	543.549	135.735	71.8239	19.4777	3.44682	1
TCGA-B8-5159-01	1	442.766	458.13	64.2499	215.796	19.5543	3.44972	1
TCGA-DV-5573-01	1	317.184	387.177	256.051	83.2829	15.0618	3.44983	1
TCGA-CZ-4862-01	1	232.01	619.023	189.557	42.453	30.6056	3.45035	1
TCGA-BP-4801-01	1	480.74	333.969	77.3403	123.041	47.4588	3.45171	1
TCGA-A3-A8OX-01	1	500.294	625.174	140.393	156.681	10.0834	3.45471	1
TCGA-G7-A8LE-01	1	18.514	579.569	351.766	21.7338	14.4892	3.45935	1
TCGA-DW-7834-01	1	352.308	1356.34	117.769	38.9235	36.9275	3.45994	1
TCGA-A3-3349-01	1	456.094	478.991	350.771	66.8572	14.6536	3.4608	1
TCGA-CZ-5457-01	1	785.488	542.765	70.7647	321.272	12.03	3.46364	1
TCGA-Y8-A8RY-01	1	293.051	694.456	400.584	36.1183	18.0591	3.46787	1
TCGA-EU-5904-01	1	609.279	512.932	112.863	72.4895	54.1377	3.47111	1
TCGA-4A-A93Y-01	1	126.151	1174.35	71.1031	36.6984	56.1944	3.47191	1
TCGA-CJ-4885-01	1	524.36	242.614	81.741	133.916	63.4797	3.47467	1
TCGA-DW-7840-01	1	193.649	2086.41	197.397	22.4883	24.987	3.4757	1
TCGA-CJ-4893-01	1	921.932	288.056	177.09	82.0846	57.0032	3.47709	1
TCGA-UN-AAZ9-01	1	55.5021	1014.04	152.256	118.504	3.75014	3.48315	1
TCGA-BQ-7049-01	1	69.0292	445.891	111.939	13.0596	250.93	3.48353	1
TCGA-CJ-6031-01	1	349.789	355.254	41.9018	102.022	122.973	3.48535	1
TCGA-B8-4154-01	1	2561.72	623.122	163.068	362.577	6.37698	3.48581	1
TCGA-BP-4758-01	1	753.842	427.207	287.475	94.3415	18.6903	3.48582	1
TCGA-UZ-A9PO-01	1	487.249	1565.27	173.919	71.7761	12.4228	3.48757	1
TCGA-CJ-4907-01	1	901.27	322.876	164.733	60.768	91.5181	3.49337	1
TCGA-BP-4162-01	1	526.317	502.393	286.042	14.5621	171.625	3.49397	1
TCGA-BQ-5888-01	1	52.9321	1050.22	294.736	24.0601	18.045	3.49783	1
TCGA-CJ-5683-01	1	2017.02	478.546	164.946	87.5638	60.0729	3.50548	1
TCGA-6D-AA2E-01	1	441.368	541.916	288.587	180.203	5.22329	3.50565	1
TCGA-A3-3376-01	1	164.154	771.576	281.788	26.7351	36.8945	3.5059	1
TCGA-KV-A6GE-01	1	356.23	1827.48	490.074	39.1235	7.20697	3.50601	1
TCGA-AL-3467-01	1	16.9713	902.309	224.399	63.171	4.71426	3.50683	1
TCGA-B0-5102-01	1	492.642	535.87	256.924	57.9099	32.6253	3.50842	1
TCGA-B1-A47M-01	1	330.606	632.463	357.142	22.1141	58.6023	3.50844	1
TCGA-BP-4975-01	1	602.675	358.053	158.689	91.0887	48.1224	3.51033	1
TCGA-A3-3343-01	1	1280.79	515.007	439.271	103.506	12.6227	3.51188	1
TCGA-BP-5194-01	1	525.32	293.352	80.1227	146.03	62.6766	3.51301	1
TCGA-B2-5639-01	1	1037.47	153.883	62.8768	607.257	28.1291	3.51327	1
TCGA-SX-A7SO-01	1	874.468	885.666	280.97	403.131	1.01801	3.51431	1
TCGA-A4-A6HP-01	1	113.429	1167.86	393.53	27.7786	15.0467	3.51607	1
TCGA-J7-8537-01	1	569.524	449.893	63.394	128.833	69.529	3.51628	1
TCGA-CZ-4866-01	1	990.675	465.394	311.616	190.319	8.12028	3.51804	1
TCGA-BQ-5887-01	1	243.716	576.056	47.4771	403.028	11.6055	3.52049	1
TCGA-IA-A83W-01	1	268.243	678.575	440.875	18.5911	54.4454	3.52194	1
TCGA-B0-5703-01	1	619.001	858.653	113.203	102.364	30.1071	3.522	1
TCGA-B0-5692-01	1	305.561	429.357	111.024	224.995	14.7377	3.52496	1
TCGA-B8-5552-01	1	229.818	654.793	116.793	56.5126	55.7591	3.52605	1
TCGA-A4-8098-01	1	176.308	1624.87	270.992	14.1482	53.3278	3.52697	1
TCGA-BP-4999-01	1	186.912	393.039	363.342	82.6837	13.3924	3.52739	1
TCGA-BP-4995-01	1	128.372	427.907	156.305	85.5813	26.7442	3.52776	1
TCGA-B0-5699-01	1	929.141	416.681	154.72	209.568	18.8284	3.5286	1
TCGA-5P-A9KA-01	1	110.286	599.907	381.759	18.179	53.3251	3.52912	1
TCGA-BQ-7056-01	1	226.645	663.233	340.364	148.711	3.97622	3.52923	1
TCGA-UZ-A9PL-01	1	101.17	1527.46	486.011	34.7151	6.94302	3.53078	1
TCGA-CJ-4643-01	1	823.758	596.773	375.05	63.8863	24.8029	3.53411	1
TCGA-Y8-A8RZ-01	1	241.253	733.709	201.459	42.2815	43.5251	3.53486	1
TCGA-SX-A71R-01	1	269.226	1680.34	923.059	7.95741	34.4821	3.53993	1
TCGA-CJ-5672-01	1	351.457	392.39	146.793	149.616	23.9951	3.54006	1
TCGA-BP-4959-01	1	464.575	746.693	95.0615	211.589	15.3325	3.5402	1
TCGA-5P-A9K2-01	1	297.347	2249.83	581.536	7.89416	47.3649	3.54081	1
TCGA-IA-A40U-01	1	178.395	736.027	190.209	61.4341	25.9913	3.54218	1
TCGA-B0-5696-01	1	830.668	390.229	48.4483	66.0659	354.113	3.54387	1
TCGA-5P-A9K0-01	1	312.091	1213.47	338.26	62.0304	10.6615	3.54401	1
TCGA-CJ-4639-01	1	762.699	310	319.842	61.508	57.8175	3.54421	1
TCGA-A3-3370-01	1	625.538	468.003	578.392	65.5435	17.8232	3.54907	1
TCGA-BP-5168-01	1	505.072	340.839	94.4901	95.615	101.239	3.5513	1
TCGA-2Z-A9J5-01	1	331.423	1121.74	192.186	35.2994	50.9881	3.5522	1
TCGA-B2-4102-01	1	414.151	505.233	561.283	42.0379	27.2468	3.55371	1
TCGA-B0-5695-01	1	2158.44	685.922	76.631	208.857	45.077	3.55422	1
TCGA-CJ-4889-01	1	250.271	377.001	214.404	66.1545	47.0255	3.55598	1
TCGA-CJ-4887-01	1	1085.66	548.85	458.546	186.629	6.02029	3.55625	1
TCGA-A4-7287-01	1	74.3864	903.097	299.87	86.0092	5.81143	3.55651	1
TCGA-DV-5575-01	1	266.375	423.908	88.7916	92.6106	75.4251	3.55878	1
TCGA-BP-5195-01	1	836.749	510.078	87.3745	160.58	50.3781	3.55949	1
TCGA-CJ-5686-01	1	737.623	344.514	98.6399	44.2429	325.657	3.5607	1
TCGA-B0-4818-01	1	1681.7	765.228	289.768	89.1019	27.7039	3.56315	1
TCGA-AS-3778-01	1	696.449	611.594	322.608	56.0361	39.2253	3.56525	1
TCGA-B0-5080-01	1	139.956	564.397	96.0482	78.668	53.9699	3.56674	1
TCGA-B9-4117-01	1	100.419	677.017	595.224	29.1538	19.4359	3.56882	1
TCGA-5P-A9JW-01	1	467.989	557.13	298.884	119.291	14.4198	3.56932	1
TCGA-MH-A560-01	1	235.827	1322.06	117.913	167.937	8.93283	3.57224	1
TCGA-Y8-A898-01	1	348.795	1885.42	208.956	30.5397	41.7911	3.57436	1
TCGA-B2-5641-01	1	216.907	651.624	56.0343	239.501	24.402	3.57518	1
TCGA-BQ-5882-01	1	397.047	824.513	146.491	189.718	12.0075	3.57966	1
TCGA-CJ-5676-01	1	357.977	775.616	81.3584	115.258	47.459	3.58085	1
TCGA-MH-A854-01	1	162.483	1235.22	366.896	12.2299	80.3678	3.58254	1
TCGA-GL-A4EM-01	1	456.348	1111.62	50.1481	172.175	38.4469	3.58263	1
TCGA-B0-4827-01	1	597.717	727.043	43.9376	84.5592	188.186	3.58489	1
TCGA-B0-5690-01	1	588.522	548.573	127.643	88.6681	71.1294	3.58765	1
TCGA-A3-3320-01	1	418.21	409.595	526.287	15.6633	158.199	3.58786	1
TCGA-MH-A562-01	1	373.589	3216.85	211.292	48.9953	15.311	3.58908	1
TCGA-CZ-5988-01	1	122.457	395.201	68.1861	69.5777	139.155	3.59015	1
TCGA-5P-A9JV-01	1	388.005	902.112	360.845	36.8605	40.7405	3.59544	1
TCGA-GL-A9DD-01	1	229.317	894.808	208.04	34.2793	67.3766	3.59577	1
TCGA-BP-5007-01	1	439.497	418.367	338.779	85.9272	29.5815	3.59606	1
TCGA-BP-4330-01	1	603.623	467.006	451.672	73.8845	27.1839	3.59656	1
TCGA-B4-5377-01	1	804.757	449.211	163.755	95.5769	70.7269	3.59789	1
TCGA-CW-6087-01	1	17.6396	774.786	75.3076	44.099	61.7387	3.59996	1
TCGA-B3-8121-01	1	209.808	1457.68	195.17	13.418	154.917	3.6003	1
TCGA-BQ-7061-01	1	469.787	808.329	115.091	468.441	5.38437	3.60051	1
TCGA-B0-4823-01	1	187.758	429.553	39.3833	109.907	165.776	3.6027	1
TCGA-BQ-5877-01	1	147.502	1927.09	42.3386	237.643	12.9747	3.6045	1
TCGA-B8-4148-01	1	533.883	631.91	446.388	121.521	10.5318	3.60556	1
TCGA-A3-A8OV-01	1	1070.61	760.511	358.904	153.526	11.184	3.60574	1
TCGA-2Z-A9JT-01	1	504.838	1944.87	182.073	74.4843	20.6901	3.60628	1
TCGA-B3-4104-01	1	64.1772	1731.42	520.245	45.0606	5.46189	3.60912	1
TCGA-BP-4993-01	1	382.2	680.105	154.221	117.821	31.6105	3.6108	1
TCGA-BP-4166-01	1	427.359	334.987	89.0331	185.857	62.3231	3.61161	1
TCGA-B8-A54H-01	1	847.078	979.005	360.514	65.9636	27.4304	3.61505	1
TCGA-P4-A5ED-01	1	119.475	2008.51	596.047	14.6025	26.55	3.61628	1
TCGA-B8-5162-01	1	118.007	422.939	67.0282	130.28	67.9723	3.61661	1
TCGA-B2-5633-01	1	77.9765	146.839	31.3932	222.79	162.029	3.61697	1
TCGA-CJ-4634-01	1	1601.1	479.774	426.642	98.3339	33.3066	3.61796	1
TCGA-A3-3362-01	1	504.998	684.391	437.596	53.9217	33.1826	3.62041	1
TCGA-B0-4824-01	1	1400.36	750.936	707.276	87.3181	14.1892	3.62228	1
TCGA-B0-5712-01	1	1028.86	499.478	110.8	285.793	29.8984	3.62384	1
TCGA-BP-5177-01	1	614.969	535.034	176.924	100.186	55.4219	3.62422	1
TCGA-BP-4987-01	1	535.043	449.054	400.6	196.546	9.55434	3.62581	1
TCGA-CJ-4869-01	1	890.585	502.574	62.7172	208.221	83.623	3.62938	1
TCGA-CJ-4894-01	1	220.838	583.44	394.659	55.5657	31.3448	3.63099	1
TCGA-CJ-5682-01	1	418.178	485.037	91.1724	551.897	10.9407	3.63103	1
TCGA-A3-3380-01	1	194.941	821.371	503.148	51.6247	18.4924	3.6328	1
TCGA-BP-4973-01	1	962.694	664.07	443.502	89.883	24.2448	3.63471	1
TCGA-MW-A4EC-01	1	514.441	668.958	210.958	93.4506	41.6364	3.63797	1
TCGA-DW-7841-01	1	207.433	734.834	291.414	50.3886	41.9905	3.63887	1
TCGA-BQ-5889-01	1	143.541	1672.44	130.32	65.16	31.1635	3.64284	1
TCGA-BQ-5879-01	1	8.22925	461.524	62.4051	16.4585	428.607	3.64733	1
TCGA-B9-4115-01	1	255.223	1728.86	267.799	36.2491	38.4684	3.64735	1
TCGA-CJ-4904-01	1	270.556	625.62	60.2692	130.365	93.0242	3.6481	1
TCGA-B0-5693-01	1	1271.93	512.243	111.397	126.006	114.136	3.65201	1
TCGA-B2-3923-01	1	306.122	398.536	681.554	46.207	40.4311	3.65402	1
TCGA-DW-5560-01	1	38.5723	1935.26	688.98	10.6406	27.9316	3.65419	1
TCGA-GL-A9DE-01	1	887.983	748.3	236.13	484.455	4.43437	3.65481	1
TCGA-A3-A6NI-01	1	262.283	1077.09	217.061	67.4206	34.5325	3.65499	1
TCGA-BP-4158-01	1	583.767	594.141	487.573	193.332	7.54465	3.65577	1
TCGA-CZ-5453-01	1	1168.97	692.38	104.012	113.327	107.893	3.65604	1
TCGA-EU-5905-01	1	98.7912	884.561	47.1158	75.9932	129.189	3.65739	1
TCGA-CZ-5455-01	1	312.229	275.496	139.369	119.382	96.1535	3.65778	1
TCGA-DW-5561-01	1	106.143	800.088	365.703	71.3567	16.0553	3.65807	1
TCGA-B0-5710-01	1	306.151	428.236	126.78	102.363	89.2158	3.65942	1
TCGA-3Z-A93Z-01	1	646.364	2188.15	131.941	126.011	20.7548	3.66022	1
TCGA-CJ-6032-01	1	2574.81	527.766	103.469	91.5588	258.3	3.66022	1
TCGA-2K-A9WE-01	1	126.896	776.648	220.892	23.4992	138.645	3.66095	1
TCGA-BP-4969-01	1	2141.79	991.796	926.603	46.9386	29.5539	3.66258	1
TCGA-BP-4159-01	1	685.716	648.085	114.286	220.21	36.237	3.66594	1
TCGA-B2-3924-01	1	1423.7	933.847	117.419	255.019	28.4374	3.66722	1
TCGA-CZ-4865-01	1	281.851	277.967	69.3531	366.739	47.7149	3.66997	1
TCGA-BP-4803-01	1	877.131	843.327	94.2961	334.484	23.1292	3.67167	1
TCGA-B0-4838-01	1	420.883	866.258	353.76	79.8227	26.3052	3.67272	1
TCGA-BP-5001-01	1	1116.48	895.217	895.217	31.4645	46.6893	3.67313	1
TCGA-CJ-5680-01	1	159.619	837.359	112.672	281.68	11.9501	3.67622	1
TCGA-B8-5550-01	1	670.596	933.33	53.7978	345.307	36.2822	3.68193	1
TCGA-AL-3472-01	1	142.576	1618.43	869.906	36.6074	10.5969	3.6883	1
TCGA-BP-4174-01	1	569.886	253.849	219.187	86.6553	149.863	3.68947	1
TCGA-AK-3460-01	1	248.167	555.29	313.979	127.511	21.9374	3.69439	1
TCGA-UZ-A9PS-05	1	1734.96	612.267	209.68	606.276	8.38722	3.69697	1
TCGA-B1-A656-01	1	555.465	814.358	79.0049	318.45	30.3865	3.69702	1
TCGA-CZ-4863-01	1	912.509	472.232	296.832	262.036	17.7531	3.69712	1
TCGA-CJ-4886-01	1	400.047	683.197	142.008	118.629	61.4791	3.69827	1
TCGA-BP-5200-01	1	186.353	364.323	88.3402	80.6024	219.239	3.69832	1
TCGA-HE-A5NJ-01	1	5.65984	1114.99	596.169	16.9795	18.8661	3.69938	1
TCGA-BP-4346-01	1	1573.42	735.816	715.113	65.5592	37.0927	3.69992	1
TCGA-B8-5549-01	1	254.682	472.141	56.8137	143.014	152.809	3.70026	1
TCGA-BP-4804-01	1	674.157	891.281	226.506	125.986	33.5068	3.70066	1
TCGA-B8-5163-01	1	104.677	361.237	54.7329	93.0459	258.613	3.70753	1
TCGA-B9-4116-01	1	20.9125	1037.1	735.035	7.74536	73.5809	3.7076	1
TCGA-B0-4694-01	1	743.077	289.522	118.319	293.108	66.3302	3.70965	1
TCGA-A4-7585-01	1	874.053	328.015	101.154	185.613	139.456	3.71031	1
TCGA-B0-5115-01	1	524.113	546.237	611.847	64.8466	39.6709	3.71061	1
TCGA-A3-3359-01	1	1200.63	603.792	550.165	77.4601	45.6816	3.71119	1
TCGA-A4-A7UZ-01	1	19.6793	922.61	394.743	26.6249	34.7281	3.71174	1
TCGA-CW-5588-01	1	119.119	1308.24	35.2179	124.298	100.475	3.71214	1
TCGA-WN-AB4C-01	1	814.574	1675.11	298.762	132.783	15.3212	3.71553	1
TCGA-BP-4998-01	1	144.062	573.923	350.279	51.6995	58.6703	3.71714	1
TCGA-CZ-5452-01	1	1474.47	563.796	258.101	748.677	5.49152	3.71784	1
TCGA-A3-3326-01	1	599.285	665.413	735.674	51.6625	41.33	3.7206	1
TCGA-BP-4777-01	1	617.856	803.04	258.738	112.495	40.6712	3.72129	1
TCGA-CJ-5684-01	1	395.767	773.545	104.149	189.362	48.2874	3.72217	1
TCGA-CW-6097-01	1	77.9023	433.332	64.2694	319.4	35.056	3.72313	1
TCGA-CW-5584-01	1	657.242	530.006	78.3634	294.073	64.0389	3.72451	1
TCGA-BP-5004-01	1	564.369	413.674	389.444	80.9619	70.9155	3.72528	1
TCGA-CJ-4884-01	1	805.363	441.125	339.386	308.321	14.7559	3.72538	1
TCGA-BP-4968-01	1	680.266	519.186	426.549	105.082	40.7883	3.72837	1
TCGA-AL-3473-01	1	384.045	608.795	216.075	179.799	29.178	3.72904	1
TCGA-BP-4991-01	1	625.286	413.914	390.734	84.9903	71.1931	3.73001	1
TCGA-DV-5566-01	1	704.788	567.239	91.2938	227.626	80.3385	3.73751	1
TCGA-BP-4340-01	1	1924.52	365.321	582.083	49.97	170.843	3.73761	1
TCGA-B1-A47O-01	1	386.658	990.812	378.603	24.1661	154.663	3.73916	1
TCGA-CW-5580-01	1	34.0156	452.282	83.1493	159.999	51.0234	3.73924	1
TCGA-BP-4756-01	1	897.774	418.906	566.756	131.422	32.034	3.73977	1
TCGA-B1-A47N-01	1	282.481	1825.83	650.294	157.424	2.94251	3.74094	1
TCGA-CZ-4853-01	1	1277.05	447.926	297.957	214.053	37.6575	3.7411	1
TCGA-CJ-4892-01	1	668.38	785.446	479.336	116.274	23.7295	3.74449	1
TCGA-A3-A8OU-01	1	1211.8	807.869	274.37	42.8704	207.683	3.74475	1
TCGA-BQ-5893-01	1	27.8599	828.608	148.287	17.9742	265.119	3.74476	1
TCGA-UZ-A9PN-01	1	150.285	761.928	306.226	45.2471	77.5664	3.74605	1
TCGA-BP-4160-01	1	223.675	318.66	72.0048	197.63	137.882	3.74642	1
TCGA-PJ-A5Z8-01	1	73.305	668.997	94.6559	139.493	54.0891	3.74735	1
TCGA-AK-3434-01	1	566.476	606.938	248.17	287.284	17.5338	3.74825	1
TCGA-BP-4961-01	1	234.505	461.625	241.276	106.481	62.1655	3.74969	1
TCGA-AK-3431-01	1	193.58	544.53	57.099	235.359	84.9522	3.7498	1
TCGA-CJ-5689-01	1	739.062	482.633	77.0262	229.129	122.852	3.75095	1
TCGA-Q2-A5QZ-01	1	377.162	5417.58	249	43.9412	27.4632	3.75379	1
TCGA-Y8-A8S1-01	1	168.485	606.16	40.6688	608.096	30.9858	3.75738	1
TCGA-B4-5832-01	1	563.23	208.289	46.7587	539.851	136.025	3.76287	1
TCGA-B2-A4SR-01	1	135.726	710.823	470.692	39.1518	67.8632	3.76715	1
TCGA-CJ-4871-01	1	700.439	373.26	62.6709	133.636	426.715	3.76754	1
TCGA-P4-AAVO-01	1	385.485	2859.01	133.437	133.437	24.7106	3.77005	1
TCGA-AK-3458-01	1	606.785	1053.06	267.52	217.664	17.024	3.77005	1
TCGA-AK-3455-01	1	771.072	691.697	327.809	157.719	34.0179	3.77026	1
TCGA-A4-A5DU-01	1	234.451	1181.97	453.642	183.122	6.93642	3.77272	1
TCGA-WN-A9G9-01	1	886.651	721.446	497.131	272.816	10.6095	3.77892	1
TCGA-AS-3777-01	1	38.537	679.991	123.07	335.645	11.1882	3.77972	1
TCGA-G7-A8LC-01	1	160.682	964.092	360.83	184.643	9.86644	3.78059	1
TCGA-CZ-5986-01	1	1057.05	407.149	160.548	35.9627	1018.52	3.78173	1
TCGA-DV-5569-01	1	289.43	426.384	81.2595	59.3468	639.119	3.78268	1
TCGA-CJ-5671-01	1	63.5902	717.214	39.6136	227.257	82.3545	3.78384	1
TCGA-BP-5180-01	1	283.017	457.822	129.022	332.961	38.2905	3.79043	1
TCGA-CZ-5987-01	1	198.29	547.817	178.125	253.743	28.5671	3.79186	1
TCGA-CW-5590-01	1	198.864	888.089	111.33	107.081	101.132	3.79318	1
TCGA-CJ-4870-01	1	1289.04	1452.29	72.5581	494.302	29.4767	3.79465	1
TCGA-BQ-5890-01	1	570.035	551.062	104.348	902.052	14.6605	3.79713	1
TCGA-BP-4170-01	1	1002.18	552.503	123.546	254.765	86.7122	3.79875	1
TCGA-CZ-4864-01	1	642.619	645.064	448.794	149.19	30.5718	3.79889	1
TCGA-CJ-6030-01	1	140.66	346.355	74.8672	431.81	51.4239	3.80302	1
TCGA-A3-3385-01	1	1167.71	937.511	562.962	266.666	9.87653	3.80363	1
TCGA-P4-A5E8-01	1	5.34681	716.472	254.865	3.56454	878.659	3.80649	1
TCGA-CJ-4918-01	1	144.666	812.554	181.049	111.748	58.0396	3.80749	1
TCGA-AK-3451-01	1	988.222	773.467	97.7746	434.748	43.6494	3.81016	1
TCGA-BP-4164-01	1	640.071	851.728	450.09	179.781	20.4007	3.81502	1
TCGA-CZ-5982-01	1	242.356	896.448	118.926	88.2934	150.459	3.81549	1
TCGA-B0-5701-01	1	156.265	290.206	58.5993	369.734	110.222	3.81662	1
TCGA-B0-5700-01	1	812.642	596.307	99.8468	224.655	126.195	3.81843	1
TCGA-CZ-5461-01	1	315.407	894.846	39.0195	453.926	66.9834	3.82161	1
TCGA-F9-A7Q0-01	1	2.27318	586.48	503.509	103.43	5.68295	3.82339	1
TCGA-A3-A6NN-01	1	212.131	576.387	252.697	162.267	43.1022	3.82509	1
TCGA-BP-5191-01	1	1471.04	611.048	311.99	258.645	38.7967	3.82639	1
TCGA-B0-4848-01	1	430.305	461.042	118.391	315.33	68.3024	3.828	1
TCGA-2Z-A9JJ-01	1	52.8368	540.211	270.561	13.6647	614.911	3.82878	1
TCGA-2Z-A9J7-01	1	96.5353	5224.19	274.561	89.013	8.77593	3.82905	1
TCGA-B0-5088-01	1	751.252	1005.71	525.069	42.8133	118.746	3.8298	1
TCGA-A3-A6NJ-01	1	365.972	1398.37	219.958	58.0314	117.935	3.83149	1
TCGA-KV-A6GD-01	1	237.712	1283	261.592	105.288	40.1615	3.83268	1
TCGA-CJ-5678-01	1	1216.38	1070.01	131.228	305.357	47.9486	3.83279	1
TCGA-B8-A54G-01	1	1041.24	838.532	383.266	170.586	37.6619	3.83631	1
TCGA-CJ-6028-01	1	302.108	590.888	83.3019	242.131	105.516	3.83693	1
TCGA-F9-A8NY-01	1	6.60246	956.257	190.371	16.5062	206.877	3.83718	1
TCGA-CJ-4916-01	1	912.982	889.916	587.821	118.308	34.9716	3.83968	1
TCGA-A3-3307-01	1	611.807	703.737	284.242	102.496	100.383	3.84114	1
TCGA-BP-5183-01	1	208.781	721.069	259.044	101.491	71.527	3.84223	1
TCGA-BP-4766-01	1	482.742	538.393	336.496	61.4752	190.25	3.84358	1
TCGA-B0-5104-01	1	1909.17	832.947	286.121	34.1312	593.302	3.84579	1
TCGA-BQ-7058-01	1	471.022	531.325	197.21	1364.17	4.8895	3.84612	1
TCGA-DV-5565-01	1	125.717	842.307	113.146	73.1447	203.434	3.8487	1
TCGA-BP-4347-01	1	553.136	621.841	480.355	133.335	44.2509	3.84873	1
TCGA-CZ-5466-01	1	636.126	774.939	86.9091	432.131	54.3182	3.85093	1
TCGA-CJ-5677-01	1	296.293	1229.87	84.2903	616.852	16.6026	3.85124	1
TCGA-BP-4790-01	1	315.395	303.714	189.821	258.936	77.8754	3.85168	1
TCGA-A3-3306-01	1	811.882	501.206	336.16	383.49	23.0579	3.85288	1
TCGA-B0-5694-01	1	150.254	461.89	154.427	271.291	47.302	3.85293	1
TCGA-B2-4098-01	1	138.229	695.336	490.086	13.9626	431.443	3.85365	1
TCGA-BP-4173-01	1	309.704	588.77	245.942	70.3874	185.491	3.85383	1
TCGA-BP-4331-01	1	578.293	622.938	557.366	80.2216	80.2216	3.85908	1
TCGA-B8-A8YJ-01	1	78.6793	1315.88	306.735	37.6293	103.766	3.86997	1
TCGA-CJ-4899-01	1	90.1499	537.387	286.84	51.5142	171.519	3.87012	1
TCGA-BP-4972-01	1	178.479	440.854	211.61	81.7585	205.198	3.87019	1
TCGA-A4-A5Y1-01	1	19.9965	1239.78	308.446	87.9845	20.4964	3.87268	1
TCGA-2Z-A9J8-01	1	649.935	1335.25	223.824	66.1472	167.675	3.87349	1
TCGA-EU-5907-01	1	957.388	659.32	127.743	431.305	57.6905	3.87784	1
TCGA-B8-A54J-01	1	367.054	919.804	319.328	126.69	55.5353	3.88231	1
TCGA-CZ-5463-01	1	378.883	335.303	152.784	230.713	143.042	3.887	1
TCGA-CJ-4903-01	1	555.79	523.817	355.787	163.948	70.069	3.8871	1
TCGA-B0-4847-01	1	1351.52	1055.71	691.538	114.38	42.0707	3.88752	1
TCGA-BP-5190-01	1	1442.73	589.524	325.846	228.307	66.4554	3.88755	1
TCGA-A3-A8CQ-01	1	525.298	818.931	406.129	156.35	42.9009	3.88886	1
TCGA-B0-5121-01	1	540.25	627.858	210.259	227.781	70.0864	3.89106	1
TCGA-2Z-A9JK-01	1	727.822	811.864	283.949	80.7785	180.324	3.89192	1
TCGA-BP-4341-01	1	1691.21	1035.25	666.04	184.146	26.5683	3.89236	1
TCGA-SX-A7SM-01	1	285.655	2122.01	213.254	157.966	30.2768	3.89524	1
TCGA-B8-A54E-01	1	344.348	1260.92	182.302	163.312	59.5013	3.896	1
TCGA-CZ-5456-01	1	235.009	561.201	52.642	299.871	180.487	3.89603	1
TCGA-BP-4759-01	1	1107.06	981.13	111.691	567.216	39.4204	3.89805	1
TCGA-BP-4765-01	1	1304.4	684.401	416.532	58.9174	278.145	3.90064	1
TCGA-CZ-5470-01	1	1044.65	601.104	119.474	913.23	29.8685	3.90317	1
TCGA-BP-4775-01	1	394.439	517.98	313.318	130.239	107.168	3.90401	1
TCGA-CZ-5462-01	1	578.976	339.636	87.3783	180.835	480.961	3.90538	1
TCGA-B8-5158-01	1	399.418	430.684	97.7051	225.894	222.768	3.90594	1
TCGA-BP-4345-01	1	138.709	849.595	249.129	84.8683	105.857	3.90814	1
TCGA-BP-4781-01	1	207.567	530.449	97.5741	246.596	130.395	3.91022	1
TCGA-B0-4841-01	1	937.848	1541.83	148.72	94.0883	215.493	3.91117	1
TCGA-BP-5187-01	1	259.313	629.103	79.7887	182.593	233.229	3.91352	1
TCGA-A3-3322-01	1	826.14	609.944	556.679	123.242	76.243	3.91403	1
TCGA-BP-5185-01	1	805.859	990.732	376.857	346.045	18.9614	3.91546	1
TCGA-B0-4843-01	1	237.359	771.417	512.865	146.937	32.4956	3.91631	1
TCGA-AK-3425-01	1	104.686	498.162	77.0105	342.937	92.6532	3.91982	1
TCGA-A3-A6NL-01	1	344.165	667.321	318.153	71.0342	197.095	3.92015	1
TCGA-CZ-5467-01	1	226.886	1176.05	57.9458	83.2461	535.386	3.92088	1
TCGA-A3-3331-01	1	2415.89	427.961	403.831	190.915	134.847	3.92118	1
TCGA-BP-5000-01	1	364.862	640.409	285.999	183.381	68.4116	3.92323	1
TCGA-A4-A5Y0-01	1	177.623	609.515	187.356	141.125	124.093	3.92786	1
TCGA-AK-3453-01	1	1359.93	1091.24	570.295	91.3935	89.5656	3.92909	1
TCGA-BP-4167-01	1	169.454	585.511	176.342	194.252	90.9264	3.93264	1
TCGA-G7-7502-01	1	143.05	573.624	259.768	192.869	57.6471	3.93516	1
TCGA-DV-5568-01	1	602.919	1033.58	107.664	180.466	179.44	3.93535	1
TCGA-B0-5402-01	1	941.731	360.297	126.069	336.874	200.471	3.93717	1
TCGA-BP-4787-01	1	782.21	474.386	199.242	188.7	190.809	3.93725	1
TCGA-MM-A563-01	1	192.453	947.192	418.527	133.326	41.7367	3.94082	1
TCGA-BP-4332-01	1	441.689	1113.75	418.651	64.3467	134.254	3.94122	1
TCGA-A3-3311-01	1	507.445	825.556	216.929	139.509	139.509	3.94356	1
TCGA-G6-A5PC-01	1	741.228	2070.58	235.251	384.617	16.8036	3.9441	1
TCGA-A3-3308-01	1	1109.36	816.845	290.522	183.069	100.489	3.94765	1
TCGA-BP-4165-01	1	1512.55	1032.72	486.579	142.715	75.2905	3.95245	1
TCGA-CJ-4641-01	1	924.081	482.011	327.695	188.81	129.807	3.95454	1
TCGA-BP-5189-01	1	229.774	250.198	125.383	155.452	496.992	3.9586	1
TCGA-B0-5107-01	1	428.487	1196.68	424.627	527.889	7.72049	3.95973	1
TCGA-B0-4846-01	1	846.754	596.594	223.328	65.4991	662.094	3.95995	1
TCGA-AK-3461-01	1	232.806	1008.47	257.481	128.74	89.0455	3.96349	1
TCGA-B0-5110-01	1	446.715	565.162	318.115	127.754	159.057	3.96842	1
TCGA-B0-5113-01	1	168.075	403.525	326.008	156.484	107.945	3.97043	1
TCGA-BP-4329-01	1	1211.2	483.444	211.507	501.573	70.79	3.97064	1
TCGA-B0-5120-01	1	267.316	511.169	158.379	242.177	134.077	3.97304	1
TCGA-AK-3428-01	1	313.897	499.635	102.156	265.605	211.741	3.97501	1
TCGA-B0-5399-01	1	1391.73	568.806	290.304	246.247	121.943	3.97542	1
TCGA-BP-5006-01	1	812.95	1066.08	187.83	115.192	252.396	3.97684	1
TCGA-B0-4699-01	1	69.5048	1262.19	292.017	78.6755	81.5716	3.97727	1
TCGA-BQ-5894-01	1	29.7198	3019.92	104.499	20.1328	492.774	3.97747	1
TCGA-BP-4967-01	1	118.462	530.683	284.172	86.2788	197.209	3.97748	1
TCGA-CJ-4875-01	1	1108.5	846.755	623.042	195.749	46.9798	3.98048	1
TCGA-BP-5196-01	1	84.8574	808.332	148.719	223.079	71.7351	3.98311	1
TCGA-CW-6093-01	1	282.933	892.388	110.162	106.199	406.567	3.98617	1
TCGA-A3-3351-01	1	158.06	397.434	539.048	90.4504	139.787	3.98628	1
TCGA-CZ-5459-01	1	641.672	746.317	105.795	183.992	340.385	3.98843	1
TCGA-BP-4353-01	1	88.1321	628.382	163.044	134.842	168.332	3.99091	1
TCGA-BP-4776-01	1	1151.42	1025.44	382.745	62.196	339.686	3.99184	1
TCGA-BP-5198-01	1	138.871	560.053	38.3723	460.468	215.616	3.99285	1
TCGA-B0-5706-01	1	61.3627	511.356	90.583	84.7389	622.393	3.99393	1
TCGA-A3-3378-01	1	477.352	523.521	331.426	62.6576	509.505	3.99667	1
TCGA-A3-3329-01	1	1088.15	526.466	257.672	210.401	190.01	3.99677	1
TCGA-BQ-5878-01	1	198.945	899.893	118.704	114.062	314.333	3.99695	1
TCGA-A3-3365-01	1	279.885	540.749	231.879	51.6293	770.817	3.9989	1
TCGA-BP-4337-01	1	585.282	870.347	390.188	182.782	73.8706	4	1
TCGA-A3-3357-01	1	351.288	490.892	374.049	82.7006	297.419	4.0009	1
TCGA-A3-3323-01	1	365.05	337.128	355.742	143.745	215.1	4.00193	1
TCGA-CZ-5454-01	1	193.088	442.144	93.7458	236.463	295.929	4.00298	1
TCGA-B8-A54D-01	1	122.557	622.668	620.691	83.0224	90.9293	4.00332	1
TCGA-B9-A44B-01	1	493.339	2694.87	556.548	161.877	21.5836	4.01277	1
TCGA-B0-4833-01	1	357.818	1091.14	742.848	146.937	35.3737	4.01474	1
TCGA-B0-4842-01	1	229.97	876.865	74.4508	436.778	107.54	4.01489	1
TCGA-B8-A7U6-01	1	284.515	1209.19	159.07	102.167	272.875	4.01994	1
TCGA-CZ-5460-01	1	1018.24	741.283	126.56	765.937	62.4584	4.0204	1
TCGA-BP-5178-01	1	128.195	635.806	77.5373	311.183	175.751	4.02143	1
TCGA-B8-4622-01	1	1313.72	842.455	298.309	158.385	202.112	4.02501	1
TCGA-AK-3436-01	1	228.236	512.576	118.581	550.828	81.6041	4.02721	1
TCGA-2Z-A9JI-01	1	221.027	1310.45	422.408	283.897	20.6292	4.02761	1
TCGA-B0-4945-01	1	211.373	531.397	408.919	78.0304	262.735	4.02812	1
TCGA-BP-4798-01	1	626.14	568.017	336.407	366.349	62.5259	4.0304	1
TCGA-B0-5075-01	1	660.702	536.553	280.406	57.7936	944.675	4.03097	1
TCGA-B0-5116-01	1	512.122	1345.2	62.3802	449.741	132.81	4.03113	1
TCGA-BP-5008-01	1	121.386	553.986	187.245	57.4647	730.254	4.03195	1
TCGA-BP-4343-01	1	215.81	277.786	69.7233	1024.82	110.672	4.03303	1
TCGA-B8-A54F-01	1	70.4152	599.481	298.789	175.086	76.1245	4.03348	1
TCGA-IA-A40Y-01	1	30.9446	2122.61	346.193	70.5925	51.2521	4.03405	1
TCGA-BP-4344-01	1	173.384	535.038	342.389	154.119	126.097	4.03663	1
TCGA-B8-4153-01	1	1807.55	848.548	189.721	281.983	189.721	4.03731	1
TCGA-AL-7173-01	1	191	957.692	111.641	188.31	209.831	4.038	1
TCGA-CJ-4872-01	1	334.874	811.494	151.491	349.049	103.651	4.04999	1
TCGA-CJ-4868-01	1	193.256	660.48	152.331	173.93	253.506	4.05318	1
TCGA-A4-7915-01	1	14.3018	918.176	117.275	33.3709	785.646	4.05415	1
TCGA-G7-6789-01	1	17.5566	661.988	173.501	422.392	25.8186	4.05607	1
TCGA-B0-5702-01	1	247.649	903.46	421.92	229.304	50.447	4.06156	1
TCGA-A3-3372-01	1	147.813	552.849	499.231	170.275	78.2539	4.06277	1
TCGA-MM-A84U-01	1	103.521	2433.39	245.043	121.866	65.5194	4.06791	1
TCGA-GL-7966-01	1	2.53135	1589.69	373.796	13.5005	259.885	4.06905	1
TCGA-B0-4718-01	1	613.881	1346.67	499.429	52.0238	325.521	4.07211	1
TCGA-BP-4327-01	1	404.381	663.527	564.805	150.931	112.961	4.07714	1
TCGA-AL-3471-01	1	234.229	854.247	1137.68	108.257	53.1444	4.0817	1
TCGA-B0-4714-01	1	1637.09	940.892	1171.51	234.952	37.8955	4.08427	1
TCGA-BP-4161-01	1	1450.52	933.26	489.785	190.734	130.295	4.08829	1
TCGA-CZ-5464-01	1	513.574	1097.08	122.384	249.867	244.767	4.09222	1
TCGA-B0-5106-01	1	308.379	787.668	500.652	113.32	160.692	4.0928	1
TCGA-BQ-5885-01	1	292.237	1938.58	235.351	53.5396	445.048	4.09428	1
TCGA-BP-5201-01	1	325.322	737.182	295.674	197.116	157.853	4.10119	1
TCGA-A3-3358-01	1	273.819	1065.84	236.854	155.392	186.882	4.10134	1
TCGA-5P-A9K3-01	1	480.754	2650.34	192.852	417.388	35.8155	4.10291	1
TCGA-B0-5698-01	1	541.859	1364.74	111.064	225.494	285.233	4.10465	1
TCGA-G7-6793-01	1	4.1941	530.134	124.145	124.145	196.284	4.10983	1
TCGA-A3-3367-01	1	1112.21	582.156	363.446	324.85	139.589	4.11067	1
TCGA-CZ-5985-01	1	115.397	627.825	151.711	164.623	337.315	4.11186	1
TCGA-B2-4099-01	1	465.406	823.997	204.092	388.156	110.629	4.1148	1
TCGA-CJ-4890-01	1	180.698	696.744	168.488	148.14	387.442	4.11556	1
TCGA-A3-3324-01	1	391.788	370.965	509.788	292.299	111.829	4.11778	1
TCGA-BP-5010-01	1	306.465	1331.58	275.684	223.492	93.6792	4.11824	1
TCGA-CZ-5984-01	1	135.424	511.515	153.996	278.586	222.869	4.12049	1
TCGA-A3-3317-01	1	81.3642	1006.31	536.543	175.01	46.8228	4.12106	1
TCGA-B0-5081-01	1	249.136	909.235	359.78	272.469	69.999	4.12116	1
TCGA-A3-3387-01	1	214.205	536.227	202.067	139.947	476.964	4.12122	1
TCGA-BP-4770-01	1	8.27543	815.958	102.615	1262	9.93052	4.12531	1
TCGA-AL-A5DJ-01	1	173.922	3005.06	166.36	276.762	51.4203	4.12969	1
TCGA-BP-4986-01	1	102.357	838.564	305.163	122.065	193.27	4.13025	1
TCGA-BP-4964-01	1	439.13	532.892	251.606	213.832	305.57	4.13039	1
TCGA-CJ-4636-01	1	283.009	468.588	402.476	177.46	221.536	4.1329	1
TCGA-BP-4981-01	1	1363.08	1099.15	538.716	131.421	217.224	4.134	1
TCGA-B0-5077-01	1	209.968	434.489	415.086	117.804	352.719	4.1351	1
TCGA-B0-4849-01	1	259.486	1157.43	608.285	141.209	88.1047	4.1418	1
TCGA-GK-A6C7-01	1	161.872	1490.44	259.606	83.99	300.837	4.14401	1
TCGA-MM-A564-01	1	169.443	1354.17	480.778	629.557	11.0207	4.14476	1
TCGA-CJ-4635-01	1	279.753	764.515	381.19	156.961	196.468	4.1468	1
TCGA-CJ-4902-01	1	469.308	650.276	419.844	173.729	220.177	4.1473	1
TCGA-B0-5400-01	1	266.317	2183.8	173.106	109.856	299.607	4.14936	1
TCGA-CJ-4908-01	1	230.548	819.873	350.14	127.565	253.802	4.1512	1
TCGA-B0-4836-01	1	145.835	604.176	224.54	187.503	270.837	4.15194	1
TCGA-CZ-4861-01	1	253.505	819.429	76.7657	375.795	338.304	4.15315	1
TCGA-AL-3468-01	1	609.211	1209.88	475.412	236.283	86.8268	4.15527	1
TCGA-CJ-4920-01	1	927.115	803.13	214.661	183.202	496.867	4.15557	1
TCGA-A3-3383-01	1	738.66	1510.49	287.044	330.42	86.7511	4.1556	1
TCGA-BP-4771-01	1	367.011	673.254	581.301	165.515	155.92	4.15994	1
TCGA-B0-5085-01	1	998.675	1512.18	1054.16	95.6178	123.949	4.16013	1
TCGA-B0-4814-01	1	1027.07	485.133	358.496	358.496	193.681	4.16036	1
TCGA-BP-4763-01	1	101.402	612.239	99.4889	347.254	271.681	4.1652	1
TCGA-B0-5109-01	1	41.5771	2164.04	154.139	145.013	131.83	4.17451	1
TCGA-A4-A57E-01	1	578.318	1025.13	233.12	176.335	360.141	4.17482	1
TCGA-BP-5175-01	1	303.636	1185.82	341.933	61.5479	640.098	4.17506	1
TCGA-BP-4349-01	1	290.444	1176.54	729.392	81.2259	200.193	4.18238	1
TCGA-BP-5199-01	1	120.765	993.348	320.412	97.7292	339.26	4.19376	1
TCGA-CW-6090-01	1	112.413	555.597	126.971	224.018	507.882	4.19456	1
TCGA-B8-A54I-01	1	301.448	1114.79	344.106	127.973	295.76	4.19781	1
TCGA-A3-3335-01	1	229.472	433.447	228.561	323.264	282.287	4.20056	1
TCGA-CJ-5679-01	1	122.647	751.043	241.16	372.076	107.489	4.20274	1
TCGA-BP-4963-01	1	217.52	913.428	352.288	185.996	197.817	4.20987	1
TCGA-B0-5092-01	1	998.831	740.495	840.901	202.904	151.655	4.21087	1
TCGA-BP-4169-01	1	361.376	760.598	271.642	156.881	493.229	4.21574	1
TCGA-B0-5098-01	1	23.4274	2384.77	327.294	245.987	26.8726	4.217	1
TCGA-CZ-4857-01	1	362.816	790.02	266.747	319.892	194.183	4.21911	1
TCGA-CJ-4876-01	1	841.824	674.022	545.592	112.493	591.527	4.22555	1
TCGA-A3-3319-01	1	1086.79	850.708	394.291	136.677	600.548	4.2275	1
TCGA-CJ-6027-01	1	101.649	630.581	149.324	358.019	245.576	4.22949	1
TCGA-CJ-4901-01	1	170.883	1172.71	172.761	332.377	169.005	4.23232	1
TCGA-CJ-6033-01	1	233.134	1095.65	88.8131	527.755	228.865	4.23258	1
TCGA-P4-AAVL-01	1	68.9981	1066.02	376.04	210.444	100.047	4.23414	1
TCGA-B0-4700-01	1	279.572	864.925	152.891	422.634	229.336	4.23615	1
TCGA-BP-4355-01	1	263.203	794.944	880.307	168.948	124.488	4.24484	1
TCGA-B0-4837-01	1	409.883	547.96	213.095	318.556	431.627	4.24718	1
TCGA-4A-A93X-01	1	446.951	3089.02	102.38	358.882	191.55	4.24894	1
TCGA-BP-4335-01	1	500.666	993.722	637.626	258.703	114.133	4.25335	1
TCGA-A3-3352-01	1	514.216	477.102	554.019	243.661	277.547	4.25389	1
TCGA-BP-4768-01	1	597.959	705.246	516.931	547.691	77.277	4.2541	1
TCGA-B0-4693-01	1	501.319	532.915	305.425	84.2553	1966.31	4.2557	1
TCGA-CJ-4878-01	1	451.774	1560.89	553.364	115.932	256.962	4.25772	1
TCGA-CJ-4888-01	1	61.7777	1140.93	259.623	183.769	190.025	4.2586	1
TCGA-CJ-4642-01	1	246.198	1622.67	358.107	313.343	89.5267	4.26779	1
TCGA-BP-4977-01	1	889.124	494.315	419.846	172.047	823.002	4.27442	1
TCGA-B0-5096-01	1	12.9556	944.583	98.9339	234.379	281.491	4.27501	1
TCGA-BP-4176-01	1	226.486	838.931	282.471	167.956	491.144	4.27924	1
TCGA-B0-4844-01	1	1590.34	1442.85	383.478	250.094	288.57	4.28075	1
TCGA-BP-4338-01	1	33.859	506.97	52.1611	206.814	1746.03	4.28313	1
TCGA-B0-4696-01	1	7.34439	1527.63	552.053	400.269	11.0166	4.28408	1
TCGA-G6-A8L6-01	1	636.378	1868.86	241.663	531.658	99.8872	4.28564	1
TCGA-DV-A4VZ-01	1	9.69995	1943.63	400.123	30.3124	482.573	4.29548	1
TCGA-A3-3325-01	1	206.744	1085.97	469.668	112.361	409.555	4.29644	1
TCGA-CJ-4882-01	1	46.3461	2093.3	209.845	130.027	275.502	4.30947	1
TCGA-B8-5551-01	1	36.9737	645.953	86.997	269.691	705.763	4.31069	1
TCGA-CJ-4895-01	1	129.511	443.065	200.596	224.941	832.572	4.31226	1
TCGA-BP-4960-01	1	806.526	1734.33	356.772	126.336	612.475	4.31351	1
TCGA-B0-5108-01	1	272.426	741.556	177.556	112.278	2129.8	4.31803	1
TCGA-B2-4101-01	1	280.712	501.018	539.216	143.021	655.587	4.31916	1
TCGA-CZ-5468-01	1	110.715	962.581	114.375	565.471	239.73	4.32745	1
TCGA-B0-4706-01	1	595.511	1500.2	433.173	378.517	138.681	4.34134	1
TCGA-5P-A9JU-01	1	764.505	1298.23	301.054	2786.41	18.0442	4.34473	1
TCGA-CZ-5469-01	1	324.053	1877.4	138.607	839.287	111.841	4.34633	1
TCGA-5P-A9K9-01	1	34.4084	901.237	490.982	449.957	48.9659	4.34816	1
TCGA-B0-5099-01	1	467.298	885.733	466.409	97.7238	1153.14	4.34946	1
TCGA-B0-5084-01	1	242.191	1537.63	638.868	207.592	164.142	4.37094	1
TCGA-DV-A4W0-01	1	83.0911	717.207	329.084	253.646	334.551	4.37329	1
TCGA-BP-4985-01	1	43.8985	576.826	147.499	401.232	420.548	4.37654	1
TCGA-CJ-4637-01	1	555.134	570.011	455.637	218.52	794.111	4.38227	1
TCGA-A3-3347-01	1	123.378	738.427	426.299	255.043	325.018	4.3936	1
TCGA-BP-5009-01	1	119.285	883.65	297.428	298.997	331.957	4.3944	1
TCGA-CZ-5465-01	1	780.032	851.048	148.848	578.917	678.906	4.40008	1
TCGA-AK-3426-01	1	84.3278	1443.69	448.624	183.835	246.237	4.40659	1
TCGA-BP-4774-01	1	1677.1	1645.07	336.735	94.4499	2587.93	4.41637	1
TCGA-B0-4688-01	1	3.45484	1956.3	242.702	322.163	57.8685	4.42135	1
TCGA-G6-A8L7-01	1	399.621	5285.55	462.454	241.28	110.587	4.42138	1
TCGA-G7-A8LD-01	1	6.54486	1216.62	623.216	244.341	57.4493	4.4272	1
TCGA-CJ-4881-01	1	261.4	1083.62	546.564	215.774	376.416	4.42959	1
TCGA-B0-4810-01	1	281.962	940.367	402.276	270.152	466.493	4.43278	1
TCGA-BP-4971-01	1	81.2671	1004.07	953.18	98.7357	401.019	4.43771	1
TCGA-B0-4698-01	1	10.6103	2095.89	341.652	144.3	190.278	4.44749	1
TCGA-BP-4326-01	1	71.3787	1178.71	309.629	81.0245	1616.63	4.45183	1
TCGA-B0-4819-01	1	189.991	1555.82	509.81	236.434	273.377	4.45608	1
TCGA-BP-4989-01	1	235.816	973.198	709.639	281.811	254.798	4.46091	1
TCGA-B0-4697-01	1	44.524	1875.58	486.982	192.01	186.444	4.46224	1
TCGA-BP-4351-01	1	396.966	1055.86	1061.29	274.613	199.389	4.46469	1
TCGA-A3-3316-01	1	349.503	788.547	515.589	238.297	667.232	4.46824	1
TCGA-B0-4690-01	1	183.771	771.84	247.479	348.757	739.169	4.47468	1
TCGA-B0-4817-01	1	651.21	617.97	379.243	306.719	1131.69	4.4777	1
TCGA-AK-3454-01	1	308.316	1759.86	529.322	174.622	502.037	4.4812	1
TCGA-B0-4811-01	1	674.84	1385.72	850.058	230.287	365.455	4.48806	1
TCGA-B0-5095-01	1	144.599	979.243	537.211	258.996	388.952	4.49363	1
TCGA-BP-4983-01	1	944.901	2132.12	284.232	230.891	994.432	4.49389	1
TCGA-B0-4845-01	1	158.795	1075.3	625.379	146.052	708.697	4.50224	1
TCGA-P4-A5EA-01	1	5.96062	2379.78	175.838	89.4093	827.036	4.5149	1
TCGA-CJ-4900-01	1	604.884	1002.25	607.091	291.404	618.129	4.5241	1
TCGA-B0-5097-01	1	109.138	941.442	152.997	245.815	1877.78	4.52609	1
TCGA-B0-4822-01	1	269.042	1856.66	591.36	187.797	523.433	4.53812	1
TCGA-B0-4712-01	1	107.925	759.669	121.547	901.125	573.157	4.54151	1
TCGA-BP-4974-01	1	276.63	1236.26	799.869	114.19	1090.97	4.54556	1
TCGA-BP-4761-01	1	537.077	1559.59	178.165	929.557	402.808	4.55443	1
TCGA-BP-4354-01	1	87.7949	865.725	255.605	411.191	663.463	4.56022	1
TCGA-B0-4691-01	1	709.263	1276.87	287.296	967.63	314.23	4.56117	1
TCGA-BP-5169-01	1	116.834	975.011	268.441	1086.28	176.643	4.5613	1
TCGA-BP-4342-01	1	490.532	955.832	581.069	241.184	1074.57	4.5712	1
TCGA-CZ-4858-01	1	50.719	849.544	174.059	1161.93	239.763	4.58239	1
TCGA-B0-4713-01	1	4209.26	865.906	466.026	450.993	1814.49	4.59475	1
TCGA-A3-3382-01	1	201.44	731.452	435.111	523.745	554.185	4.59852	1
TCGA-CJ-4638-01	1	648.636	1141.84	1128.39	509.643	225.678	4.6029	1
TCGA-BP-4799-01	1	137.536	1634.25	53.3962	618.102	1982.13	4.6068	1
TCGA-B0-4703-01	1	11.7894	851.36	267.787	173.472	1320.41	4.61904	1
TCGA-CZ-4854-01	1	214.873	1254.83	425.158	404.512	617.091	4.62731	1
TCGA-B2-5635-01	1	324.072	443.382	996.399	112.861	3963.03	4.63433	1
TCGA-B0-4852-01	1	783.634	891.153	390.848	342.416	2076.29	4.63974	1
TCGA-B0-4701-01	1	157.001	1704.45	313.061	435.278	583.817	4.64276	1
TCGA-B0-4828-01	1	802.552	1304.3	495.585	408.056	1031.85	4.65774	1
TCGA-DV-A4VX-01	1	713.269	2296.27	297.43	482.091	857.05	4.65978	1
TCGA-CJ-4912-01	1	122.65	842.722	520.932	949.546	232.111	4.66787	1
TCGA-B0-4707-01	1	242.197	1321.4	564.533	272.472	991.939	4.66836	1
TCGA-B0-5094-01	1	206.003	752.394	334.755	370.162	1835.52	4.67196	1
TCGA-B0-4815-01	1	73.8824	1367.97	613.148	322.188	559.83	4.70768	1
TCGA-F9-A4JJ-01	1	1.14438	3811.94	314.705	114.438	476.064	4.71953	1
TCGA-CJ-4873-01	1	199.626	1110.25	628.958	527.778	593.408	4.73239	1
TCGA-AK-3445-01	1	134.181	891.911	324.741	787.047	790.43	4.74175	1
TCGA-BP-4992-01	1	131.937	3344.09	1135.42	197.905	412.303	4.75051	1
TCGA-B0-4710-01	1	1090.62	919.269	409.079	454.618	3062.69	4.75109	1
TCGA-B0-4813-01	1	30.4349	2171.02	694.205	207.247	675.364	4.78578	1
TCGA-AL-3466-01	1	277.7	974.476	1312.77	401.403	696.775	4.78934	1
TCGA-B8-4620-01	1	79.3411	1282.68	205.909	400.484	3303.05	4.8306	1
TCGA-CJ-4891-01	1	64.4837	2155.45	290.705	901.715	575.068	4.86804	1
TCGA-B8-4143-01	1	227.475	1502.56	892.56	388.646	1198.58	4.87316	1
TCGA-CZ-4860-01	1	17.1685	3263.93	71.5355	1429.76	929.008	4.93715	1
TCGA-A3-3346-01	1	13.8017	1336.79	341.099	643.751	1270.74	4.98028	1
TCGA-B0-4821-01	1	38.5817	4349.63	447.364	456.55	2051.26	5.12953	1
TCGA-BP-4352-01	1	6.23502	3111.27	863.104	641.316	3329.5	5.45374	1
